1        **1. Title**

2        **Influenza A virus (H1N1) infection induces microglia activation and temporal dysbalance**  
3        **in glutamatergic synaptic transmission.**

4        **2. Author Names and Affiliations**

5        Henning Peter Düsedau<sup>1</sup>, Johannes Steffen<sup>1</sup>, Caio Andreea Figueiredo<sup>1</sup>, Julia Désirée  
6        Boehme<sup>2,3</sup>, Kristin Schultz<sup>3</sup>, Christian Erck<sup>4</sup>, Martin Korte<sup>5,6</sup>, Heidi Faber-Zuschratter<sup>7</sup>, Karl-  
7        Heinz Smalla<sup>7,8</sup>, Daniela Dieterich<sup>8</sup>, Andrea Kröger<sup>9,10</sup>, Dunja Bruder<sup>2,3</sup>, Ildiko Rita Dunay<sup>1,11</sup>

8

9        <sup>1</sup>Institute of Inflammation and Neurodegeneration, Health Campus Immunology, Infectiology  
10        and Inflammation (GC-I<sup>3</sup>), Otto-von-Guericke-University, D-39120, Magdeburg, Germany

11        <sup>2</sup>Institute of Medical Microbiology and Hospital Hygiene, Infection Immunology Group,  
12        Health Campus Immunology, Infectiology and Inflammation (GC-I<sup>3</sup>), Otto-von-Guericke-Uni-  
13        versity, D-39120, Magdeburg, Germany

14        <sup>3</sup>Helmholtz Centre for Infection Research, Immune Regulation Group, D-38124, Braun-  
15        schweig, Germany

16        <sup>4</sup>Helmholtz Centre for Infection Research, Cellular Proteome Research Group, D-38124,  
17        Braunschweig, Germany

18        <sup>5</sup>Department of Cellular Neurobiology, Zoological Institute, TU-Braunschweig, D-38106  
19        Braunschweig, Germany

20        <sup>6</sup>Helmholtz Centre for Infection Research, Neuroinflammation and Neurodegeneration Group,  
21        D-38124, Braunschweig, Germany

22 <sup>7</sup>Leibniz Institute of Neurobiology, D-39120, Magdeburg, Germany

23 <sup>8</sup>Institute for Pharmacology and Toxicology, Health Campus Immunology, Infectiology and  
24 Inflammation (GC-I<sup>3</sup>), Otto-von-Guericke-University, D-39120, Magdeburg, Germany

25 <sup>9</sup>Helmholtz Centre for Infection Research, Innate Immunity and Infection Group, D-38124,  
26 Braunschweig, Germany

27 <sup>10</sup>Institute of Medical Microbiology and Hospital Hygiene, Molecular Microbiolgy Group,  
28 Health Campus Immunology, Infectiology and Inflammation (GC-I<sup>3</sup>), Otto-von-Guericke-Uni-  
29 versity, D-39120, Magdeburg, Germany

30 <sup>11</sup>Center for Behavioral Brain Sciences (CBBS), D-39106 Magdeburg, Germany

31

32 **Corresponding author**

33 Prof. Dr. Ildiko Rita Dunay

34 Institution of Inflammation and Neurodegeneration

35 Health Campus Immunology, Infectiology and Inflammation (GC-I<sup>3</sup>)

36 Otto-von-Guericke-University

37 Leipziger Straße 44

38 D-39120 Magdeburg

39 Phone: +49 391 67 13088

40 Fax: +49 391 67 13097

41 E-mail: [ildiko.dunay@med.ovgu.de](mailto:ildiko.dunay@med.ovgu.de)

42

### 43        **3. Abstract**

44    Influenza A virus (IAV) causes respiratory tract disease and is responsible for seasonal and  
45    reoccurring epidemics affecting all age groups. Next to typical disease symptoms such as fever  
46    and fatigue, IAV infection has been associated with behavioral alterations presumably contrib-  
47    uting to the development of major depression. Previous experiments using IAV/H1N1 infection  
48    models have shown impaired hippocampal neuronal morphology and cognitive abilities, but  
49    the underlying pathways have not been fully described. In this study, we demonstrate that in-  
50    fection with a low dose non-neurotrophic H1N1 strain of IAV causes ample peripheral immune  
51    response followed by a temporary blood-brain-barrier disturbance. Although histological ex-  
52    amination did not reveal obvious pathological processes in the brains of IAV-infected mice,  
53    detailed multidimensional flow cytometric characterization of immune cells uncovered subtle  
54    alterations in the activation status of microglia cells. More specifically, we detected an altered  
55    expression pattern of major histocompatibility complex class I and II, CD80, and F4/80 accom-  
56    panied by elevated mRNA levels of CD36, CD68, C1QA, and C3, suggesting evolved synaptic  
57    pruning. To closer evaluate how these profound changes affect synaptic balance, we established  
58    a highly sensitive multiplex flow cytometry-based approach called Flow Synaptometry. The  
59    introduction of this novel technique enabled us to simultaneously quantify the abundance of  
60    pre- and postsynapses from distinct brain regions. Our data reveal a significant reduction of  
61    VGLUT1 in excitatory presynaptic terminals in the Cortex and Hippocampus, identifying a  
62    subtle dysbalance in glutamatergic synapse transmission upon H1N1 infection in mice. In con-  
63    clusion, our results highlight the consequences of systemic IAV-triggered inflammation on the  
64    central nervous system and the induction and progression of neuronal alterations.

65

66      **4. Keywords**

67      Influenza A virus, microglia activation, glutamatergic synapse transmission, synaptosomes,

68      Flow Synaptometry

69

70



## 71      **5. Introduction**

72      Influenza A virus (IAV) causes infection of the respiratory tract and repeatedly appears  
73      throughout the lifetime of almost every individual. Subtypes of IAV, such as H1N1, often con-  
74      tribute to seasonal epidemics or may even cause pandemics, thus representing a major cause for  
75      morbidity and mortality worldwide [1]. Approximately 8% of the U.S. population become in-  
76      fected with IAV each season [2], eventually resulting in over 30,000 IAV-associated deaths per  
77      year [3]. Based on these assumptions, it has been extrapolated that influenza infections sum up  
78      to 4-50 million annual cases and 15-70,000 deaths in the EU [4, 5]. The resolution of IAV  
79      infection requires the activation of innate and adaptive immunity and is initiated in lung epithe-  
80      lial cells, which are primary targets of IAV. Here, IAV is detected by cytosolic pattern recog-  
81      nition receptors such as endosomal toll-like receptors or retinoic acid inducible gene I, resulting  
82      in the initiation of NF- $\kappa$ B-dependent release of a plethora of cytokines and chemokines includ-  
83      ing interleukin (IL)-1 $\beta$ , IL-6, tumor necrosis factor (TNF), and type I interferons (IFN) that  
84      induce an anti-viral state via IFNAR1 and IFNAR2 receptor activation. The induction of inter-  
85      feron-regulated pathways is characterized by the expression of various GTPases such as MX  
86      proteins that interfere with virus growth in infected cells [6]. Potent activation of innate im-  
87      munity results in the subsequent establishment of adaptive cellular immunity mediated by virus-  
88      specific CD8<sup>+</sup> cytotoxic T cells and CD4<sup>+</sup> T helper cells, and humoral immunity via antibody-  
89      producing B cells [7]. As a consequence of the mounted immune response, IAV infection is  
90      associated with high serum levels of pro-inflammatory cytokines resulting in distinct behavioral  
91      alterations in patients, a phenomenon also referred to as sickness behavior [8]. Although the  
92      profound mechanism for the induction of sickness behavior is not fully understood, previous  
93      reports have highlighted that this effect is caused by a transport of peripheral cytokines into the  
94      brain parenchyma via the blood-brain barrier (BBB) [9, 10]. Thus, it has been speculated that  
95      infections such as IAV pneumonia may act as one of the initial triggers contributing to the

96 development of neurological disorders and therefore have been studied in experimental models  
97 over the past years [11–14].

98 As brain-resident macrophages, microglia cells represent the first line of defense against path-  
99 ogens. Under homeostatic conditions, microglia cells possess a highly ramified morphology,  
100 constantly scanning their environment for pathogens as well as supporting neuronal function  
101 and synaptic plasticity [15–18]. Microglia become activated upon sensing of pathogens and  
102 inflammatory signals, releasing cytokines, chemokines, and other inflammatory mediators such  
103 as nitric oxide and complement factors [19]. Therefore, microglia activation has often been  
104 linked to neuropathologies like Alzheimer’s disease (AD) or schizophrenia and moreover, to  
105 aggravated phagocytosis of synapses [20, 21]. Although previous reports indicate that periph-  
106 eral inflammation induced by viral infection or polyinosinic:polycytidylic acid (poly[I:C]) and  
107 lipopolysaccharides (LPS) administration leads to microglia activation and behavioral changes  
108 [22–24], the underlying pathways of neurological alterations have not been fully understood.  
109 Here we demonstrate that respiratory IAV/PR8/H1N1 infection results in a distinct peripheral  
110 inflammatory pattern that is associated with transient dysbalance in BBB homeostasis. Even  
111 though initial histological examination of brain sections did not reveal evidence for pathological  
112 changes, detailed flow cytometric characterization highlighted distinct region-specific activa-  
113 tion of microglia in the early phase of infection. We detected that expression of markers asso-  
114 ciated with synaptic pruning peak at 14 days post infection (dpi) alongside with diminished  
115 mRNA levels of the presynaptic glutamate transporter VGLUT1. Notably, the establishment of  
116 a novel flow cytometry-based approach (“Flow Synaptometry”) enabled us to assess the com-  
117 position of excitatory and inhibitory synapses, demonstrating a significant reduction of  
118 VGLUT1 in excitatory presynapses at 21 dpi, which is further accompanied by changes in neu-  
119 rotrophin gene expression. Our findings provide detailed insights into temporal effects of pe-  
120 ripheral inflammation on brain homeostasis and microglia-neuronal interaction that specifically

- 121 shape synapse physiology over the course of IAV infection, possibly contributing to persisting  
122 neurological alterations.

## 123 **6. Material and Methods**

### 124 **Animals**

125 The experiments were performed with female C57BL/6JRj (8 weeks old, purchased from  
126 Janvier, Cedex, France). Animals were group-housed under specific pathogen-free conditions  
127 in individual-ventilated cages with a 12 h day/night cycle with free access to food and water.  
128 All animal care was in accordance with institutional guidelines and experiments were per-  
129 formed in accordance to German National Guidelines for the Use of Experimental Animals and  
130 the protocol was approved by the Landesverwaltungsamt Saxony-Anhalt.

### 131 **IAV infection**

132 The virus stock of mouse-adapted IAV PR/8/A/34(H1N1) was derived from Madin-Darby Ca-  
133 nine Kidney cells as described previously [25]. First, mice were anesthetized by intraperitoneal  
134 injection of ketamine (1 %)-xylazine (10 mg/ml) and ointment was applied to keep eyes hy-  
135 drated. Subsequently mice were intranasally (i.n.) inoculated with 0.04 of the median lethal  
136 dose (MLD)<sub>50</sub> of IAV diluted in PBS whereas mock-infected animals received PBS only [26].

### 137 **Isolation of bronchoalveolar lavage fluid, tissue, and cells**

138 To collect bronchoalveolar lavage fluid (BAL fluid), the trachea was punctured and a vein cath-  
139 eter was carefully inserted. BAL was performed using 1 ml ice-cold phosphate-buffered saline  
140 (PBS). BAL fluid was spun down at 420 x g for 10 min. Aliquots of BAL supernatants were  
141 stored at -80 °C. Tissue collection and cell isolation was performed as described previously  
142 [27]. In brief, mice were deeply anesthetized with Isoflurane (CP Pharma, Burgdorf, Germany)  
143 and perfused intracardially with 60 ml sterile PBS prior brain extraction. For subsequent anal-  
144 ysis by flow cytometry, brains were dissected into specific regions (Cortex - CTX, Hippocam-  
145 pal formation – HPF) according to the Allen Mouse Brain Atlas [28], collected in separate tubes

146 and homogenized in a buffer containing Hank's balanced salt solution (HBSS, Gibco, New  
147 York, NY, USA), 13 mM HEPES (pH 7.3, Thermo Fisher Scientific, Waltham, MA, USA) and  
148 0.68 % glucose before sieving through a 70  $\mu$ m cell strainer. The homogenate was fractioned  
149 on a discontinuous 30-70 % Percoll gradient (GE Healthcare, Chicago, IL, USA). Immune cells  
150 were collected from the 30/70 % Percoll interphase, washed in PBS and immediately processed  
151 for subsequent flow cytometric analysis. For RNA isolation or synaptosome preparation, per-  
152 fused brains were dissected as described above and either stored in RNAlater solution (Thermo  
153 Fisher Scientific) at -20 °C or snap frozen in liquid nitrogen and stored at -80 °C until further  
154 use.

155 For immunohistochemistry (IHC) or immunofluorescence (IF), mice were perfused with 40 ml  
156 sterile PBS followed by 20 ml of 4 % paraformaldehyde (PFA) solution. Brains were extracted  
157 and post-fixed in 4 % PFA for 4 h (IF) or 24 h (IHC) before being transferred to 30 % sucrose  
158 solution. After two days, IF-samples were slowly frozen to -80 °C in Tissue-Tek® O.C.T.™  
159 Compound (Sakura Finetek Europe B.V., Alphen aan den Rijn, Netherlands) using liquid ni-  
160 trogen and 2-methylbutane, whereas IHC-samples were moved to PBS + 0.1 % NaN<sub>3</sub> and stored  
161 at 4 °C until further use.

## 162 **Cytokine immunoassay**

163 Serum cytokine levels were assessed using the LEGENDplex™ Mouse Inflammation Panel  
164 (BioLegend, San Diego, CA, USA) according to the manufacturer's instructions. Flow cytom-  
165 etry was performed with an LSR Fortessa instrument (BD, Franklin Lakes, NJ, USA) and data  
166 was analyzed using the LEGENDplex™ Data Analysis Software (v8.0, BioLegend).

## 167 **RNA isolation**

168 Tissue samples were collected and stored in RNAlater solution as described above and prepared  
169 for RNA isolation as follows: Isolated brain regions were homogenized in lysis buffer using

170 BashingBeads Lysis tubes (Zymo Research Europe, Freiburg, Germany) and isolated using All-  
171 Prep DNA/RNA Mini Kit (Qiagen, Hilden, Germany) according to the manufacturer's instruc-  
172 tions. Concentration and purity of isolated RNA was determined using a NanoDrop 2000 spec-  
173 trophotometer (Thermo Fisher) and stored at -80 °C until further use.

#### 174 **Reverse transcription qPCR**

175 Gene expression levels of cytokines, inflammatory mediators, tight junction proteins, neurotro-  
176 phins and neurotrophin receptors, synapse associated protein, and complement system were  
177 assessed in duplicates using either 30 ng isolated RNA or 600 ng for absolute quantification of  
178 viral load, respectively. Amplification was carried out with TaqMan® RNA-to-CT™ 1-Step  
179 Kit (Applied Biosystems, Foster City, CA, USA) or Power SYBR® Green RNA-to-CT™ 1-  
180 Step Kit (ThermoFisher Scientific) and LightCycler® 96 (Roche, Basel, Switzerland) as previ-  
181 ously described [29]. Thermal-cycling parameters were set as follows: reverse transcription  
182 (48 °C, 30 min), inactivation (95 °C, 10 min) followed by 55 cycles of denaturation (95 °C,  
183 15 s) and annealing/extension (60 °C, 1 min). In case of the SYBR® green RT-PCR, amplifi-  
184 cation was followed by a melting curve analysis. Utilized TaqMan® Gene Expression Assays  
185 (Applied Biosystems) are listed in **Table 1**. Self-designed primers were synthesized by Tib  
186 MolBiol (Berlin, Germany) and used at 100 nM final concentration (listed in **Table 2**). For  
187 relative quantification, expression of *Hprt* was chosen as reference and relative target gene  
188 mRNA levels were determined by the ratio target gene / reference gene and subsequently nor-  
189 malized to mean values of control group. For absolute quantification of viral load, a standard  
190 curve was established by using a reference plasmid standard with known numbers of IAV Nu-  
191 cleoprotein (NP) copies per sample ( $1.5 \times 10^1$  to  $1.5 \times 10^9$ ) [30].

## 192 **Histopathology and immunohistochemistry**

193 For histopathology, brains collected from naive and infected mice were first dehydrated in Zinc  
194 fixative (BD) followed incubation in ethanol at concentrations increasing from 70 % to 100 %.  
195 Then, brains were embedded in paraffin and sagittal sections of 3  $\mu\text{m}$  were mounted on object  
196 slides before de-paraffinization in Xylol and alcohol at concentrations decreasing from 100 %  
197 to 70 %. For Hematoxylin and eosin staining, slides were first stained in Mayer's hemalum  
198 solution (Sigma-Aldrich, St. Louis, MO, USA) and rinsed with tap water and 0.1 % HCl before  
199 applying eosin Y solution (Sigma-Aldrich) and rinsing in distilled water. Staining with anti-  
200 bodies against CD11b (dilution 1:100, #HS-384 117, Synaptic Systems, Göttingen, Germany),  
201 IBA1 (dilution 1:500, #HS-234 017, Synaptic Systems), MAP2 (2  $\mu\text{g}/\mu\text{l}$ , #188 011, Synaptic  
202 Systems), and NeuN (dilution 1:2000, #266 008, Synaptic Systems) was performed at room  
203 temperature for 1 h after antigen retrieval using 10 mM citrate + Tween (pH 6.0) and blocking  
204 of endogenous peroxidase activity. Subsequently, slides were incubated with matching, bioti-  
205 nylated secondary antibodies and developed using VECTASTAIN® ABC-HRP Kit (#PK-  
206 4000, Vector Laboratories, Burlingame, CA, USA). Upon incubation with DAB substrate, sam-  
207 ples were counterstained with Hematoxylin and rinsed with tap water, then dehydrated in alco-  
208 hol at increasing concentrations, Propanol, and Xylol before mounting. Finally, sections were  
209 imaged and analyzed using an Olympus VS120 virtual-slide-microscope (Olympus Life Sci-  
210 ence, Waltham, MA, USA) equipped with an Olympus VC50 camera and a 40x objective, and  
211 Olympus VS-ASW imaging software (version 2.9.2 Build 17565, Olympus Life Science).

212 To obtain samples for immunohistochemistry, sagittal sections of 20  $\mu\text{m}$  from frozen brain tis-  
213 sue were transferred to SuperFrost Plus™ (Thermo Scientific) slides. Antigen retrieval (10 mM  
214 Citrate buffer, pH 6.0, 0.1 % Tween-20) was performed at 96 °C for 30 min. Blocking and  
215 permeabilization was performed in PBS + 0.3 % (v/v) Triton X-100 with 5 % normal-goat-

216 serum and unconjugated F(ab')<sub>2</sub> goat anti-mouse IgG (H+L) antibody (1:500, Thermo Scien-  
217 tific), at 4 °C for 2 h. Subsequently, sections were incubated with the following primary anti-  
218 bodies at 4 °C overnight: anti-IBA1 (dilution 1:200, #HS-234 004, Synaptic Systems) and anti-  
219 TMEM119 (dilution 1:200, #ab209064, abcam, Cambridge, UK). Next, slides were washed and  
220 subsequently incubated with matching secondary antibodies (dilution 1:1000) at room temper-  
221 ature in the dark for 1 h before mounting on a glass slide using ProLong™ Gold antifade  
222 mountant with DAPI (Thermo Fisher). To image microglia cells in the Cortex and Hippocam-  
223 pus, z-stacks were generated with a 20x objective at a z-step of 1 µm using a SP8 laser scanning  
224 confocal microscope (Leica Biosystems, Nußloch, Germany). Composite images were gener-  
225 ated using ImageJ with Fiji distribution [31].

## 226 **Flow cytometric analysis**

227 For flow cytometric analysis of cell phenotypes, freshly isolated cells were first incubated with  
228 Zombie NIR™ fixable dye (BioLegend, CA, USA) for live/dead discrimination and with anti-  
229 FcγIII/II receptor antibody (clone 93) to prevent unspecific binding of antibodies. Cells were  
230 further stained with the following fluorochrome-conjugated antibodies against cell surface  
231 markers in FACS buffer (PBS containing 2 % fetal bovine serum and 0.1 % sodium azide):  
232 eFluor™ 450-CD45 (clone 30-F11) and FITC-MHC Class I (clone 28-14-8), APC-CD11b  
233 (clone M1/70) (purchased from eBioscience™, San Diego, CA, USA); Brilliant Violet™ 421-  
234 CD86 (clone GL-1), Brilliant Violet™ 510-F4/80 (clone BM8), Brilliant Violet™ 605-F4/80  
235 (clone BM8), Brilliant Violet™ 605-CD11b (clone M1/70), PerCP/Cy5.5-CD80 (clone 16-  
236 10A1), PE/Dazzle594™-MHC Class II (I-A/I-E) (clone M5/114.15.2), PE/Cy7-CX3CR1  
237 (clone SA011F11) (purchased from BioLegend). Cells were acquired using a SP6800 Spectral  
238 Cell Analyzer (Sony Biotechnology, San Jose, CA, USA) and obtained data were analyzed  
239 using FlowJo software (version 10.5.3, FlowJo LLC, OR, USA). Fluorescence Minus One  
240 (FMO) controls were used to determine the level of autofluorescence.



## 241 **Preparation of synaptosomes from frozen brain samples**

242 Synaptosomes were obtained from Cortex and Hippocampal formation according to protocols  
243 published elsewhere [32] but with slight modifications: After first homogenization steps, the  
244 crude membrane pellet P2 was fractionated on a discontinuous sucrose gradient with layers of 5  
245 mM Tris/HCl pH 8.1 containing 0.32 M, 1.0 M or 1.2 M sucrose at 80,000 x g, 4 °C for 2 h.  
246 Subsequently, synaptic material was collected from the 1.0/1.2 M interphase and washed with  
247 SET buffer (320 mM sucrose, 1 mM EDTA, 5 mM Tris, pH 7.4) at 100,000 x g, 4 °C 1 h.  
248 Finally, the pelleted synaptosomes were resuspended in SET buffer containing 5 % DMSO,  
249 aliquoted and slowly frozen to - 80 °C using an isopropanol freezing container and stored until  
250 further use [33].

## 251 **Flow Synaptometry**

252 Aliquots of frozen synaptosomes were thawed in a water bath at 37 °C and centrifuged for 10  
253 min at 14,000 x g to remove sucrose-containing buffer. Supernatant was removed gently and  
254 pellets were resuspended in fixation buffer (FoxP3 Transcription Factor Staining Buffer Set,  
255 #00-5523-00, eBioscience™) and incubated on ice for 45 min. Subsequently, samples were  
256 centrifuged again for 10 min at 14,000 x g, resuspended in permeabilization puffer (FoxP3  
257 Transcription Factor Staining Buffer Set, eBioscience™) reconstituted with 10 % Normal Goat  
258 Serum (NGS, ThermoFisher) and stained with primary antibodies against Gephyrin  
259 (#ab136343, abcam), GluR1 (#ABN241, Sigma-Aldrich), Homer1 (#MAB6889, R&D Sys-  
260 tems, Minneapolis, MN, USA), Synaptophysin (#101 004, Synaptic Systems), and VGLUT1  
261 (#135 303, Synaptic Systems). Following incubation, samples were washed and resuspended in  
262 Permeabilization buffer + 10 % NGS and stained with matching secondary antibodies: goat  
263 anti-mouse AlexaFluor® 405 (#A31553, ThermoFisher), goat anti-rabbit AlexaFluor® 488  
264 (#ab150081, abcam), goat anti-chicken AlexaFluor® 546 (#A-11040, abcam), and goat anti-  
265 guinea pig AlexaFluor® 647 (#A21450, ThermoFisher). Finally, samples were washed once

266 more and resuspended in SET buffer before adding the styryl dye FM4-64 (#T13320, Ther-  
267 moFisher) to a final concentration of 0.2  $\mu\text{g/ml}$  [33]. Samples were acquired using the Attune  
268 NxT Flow Cytometer (ThermoFisher) equipped with 405, 488, 561, and 633nm lasers. Voltages  
269 for forward-scatter light (FSC), side-scatter light (SSC) and fluorescence detection channels  
270 were set as follows: FSC 400 V, SSC 500 V, VL1 400 V, BL1 400 V, BL3 380 V, YL1 400 V,  
271 RL1 440 V. For optimal acquisition of synaptosomes, the FSC-triggered detection was replaced  
272 by a fluorescence-triggered detection with FM4-64 in the BL3 channel (threshold set to 0.3 x  
273  $10^3$  to select only FM4-64-positive events). Furthermore, the event rate was kept below 300  
274 events/second by utilizing the slowest flow rate in combination with an adequate dilution of the  
275 sample prior to measurement to reduce coincident particle detection. A size range from 300 -  
276 1000 nm was applied to detected events in the FSC channel using red-fluorescent silica beads  
277 with a diameter of 300 nm (#DNG-L020, Creative Diagnostics, Shirley, NY, USA) and 1000  
278 nm (#DNG-L026, Creative Diagnostics) [33]. Obtained data were analyzed using FlowJo soft-  
279 ware (version 10.5.3, FlowJo LLC, Ashland, OR, USA). Fluorescence Minus One (FMO) con-  
280 trols were used to determine the level of autofluorescence.

## 281 **Western blot analysis of synaptic proteins**

282 For Western blot analysis, aliquots of isolated synaptosomes were thawed in a water bath at  
283 37 °C and centrifuged for 10 min at 14,000 x g to remove sucrose containing buffer. Pellets  
284 were lysed for 30 min at 37 °C in RIPA lysis buffer containing protease inhibitors, 50 mM  
285 Tris/HCl (pH 7.4); 150 mM NaCl; 1 % IGEPAL CA-630; 0.25 % Na-deoxycholate; 1 mM  
286 NaF. Subsequently, samples were centrifuged for 30 min at 100,000 x g and only supernatants  
287 were used for further separation on a 12.5 % SDS-PAGE with loading buffer (50 mM Tris/HCl  
288 pH 6.8, 100 mM dithiothreitol, 2 % SDS, 1.5 mM bromophenol blue, 1 M glycerol). Next,  
289 proteins were transferred to nitrocellulose membranes and incubated with antibodies against

290 VGLUT1 (dilution 1:1000, Synaptic Systems) at 4 °C overnight. For the loading control, mem-  
291 branes were incubated with a 1:1000 dilution of anti- $\beta$ -Actin antibody (#4970, Cell Signaling  
292 Technology, Cambridge, UK). Following incubation, membranes were incubated with match-  
293 ing HRP-conjugated secondary antibodies at room temperature for 2 h before revealing bound  
294 antibodies using enhanced chemiluminescence assay. Densitometric analysis of blots was per-  
295 formed using ImageJ with Fiji distribution [31].

## 296 **Electron microscopy of synaptosomes**

297 Electron microscopic analysis of isolated synaptosomes was performed according to Breukel et  
298 al. [34] but with minor modifications: Synaptosomes were first fixed in 0.1 M cacodylate buffer  
299 (pH 7.4) with 2.5 % paraformaldehyde and 2.5 % glutaraldehyde in the refrigerator overnight.  
300 Then, the suspension was post-fixed in 0.1 M cacodylate buffer containing 1 % osmium tetrox-  
301 ide for 30 minutes and rinsed with distilled water subsequently. This was followed by a stepwise  
302 dehydration in a graded series of ethanol (50 % - 100 %) for 5 minutes each. Finally, the sus-  
303 pension was embedded in Durcupan ACM (Honeywell Fluka™, Morristown, NJ, USA) by  
304 dropping it carefully into the tubes. The resin polymerized at 70 °C for 3 days. For sectioning,  
305 the tubes were cut off and the complete block of Durcupan with the pellet of synaptosomes at  
306 the tip was directly placed in an ultramicrotome (Ultracut E, Reichert-Jung, Wetzlar, Germany).  
307 Ultrathin sections of 50-70 nm were collected on Formvar-coated slot grids of copper and ex-  
308 amined with a LEO 912 transmission electron microscope (Carl Zeiss, Oberkochen, Germany)  
309 and imaged with a MegaScan™ 2K CCD camera (Gatan In-c., CA, USA) using the Digi-  
310 talMicrograph® software (version 2.5).

311 **Statistical analysis**

312 Relative body weight was compared by multiple *t*-test with Holm-Sidak *post-hoc* correction.  
313 Data from flow cytometry and RT-qPCR were compared by Student's *t*-test with Welch's cor-  
314 rection and Western blot analysis by one-way ANOVA with Holm-Sidak *post-hoc* correction  
315 using GraphPad Prism 7 (GraphPad Software, CA, USA) and R (version 4.0.3) [35] with “lat-  
316 tice” package [36]. Data shown is representative of three independent experiments. In all cases,  
317 results are presented as arithmetic mean and were considered significant, with  $p < .05$ .

318

## 319        **7. Results**

### 320        **Infection with influenza A virus (H1N1) alters brain homeostasis of mice and tem-** 321        **porarily affects blood-brain barrier function**

322        To explore the effects of virus-induced peripheral inflammation on microglia activation and  
323        neuronal alterations, we infected mice with a low dose of the mouse-adapted influenza A virus  
324        (IAV)/PR8/H1N1 and monitored their body weight and cytokine levels in serum and lung  
325        throughout the infection (**Fig. 1a, b**). After 4 to 5 days post infection (dpi) with 0.04 of the  
326        median lethal dose (MLD)<sub>50</sub> of IAV, the body weight of infected mice started to decline and  
327        this trend became significant after 7 dpi (naive  $100.8 \pm 0.7$  g vs. IAV-infected  $89.8 \pm 1.9$  g,  $p <$   
328         $.05$ ) while reaching its peak at 8 dpi (naive  $102.2 \pm 0.6$  g vs. IAV-infected  $86.7 \pm 2.5$  g,  $p <$   
329         $.001$ ) (**Fig. 1b**). Beyond this point, mice started to recover and reached their initial weight by  
330        14 dpi (naive  $107.9 \pm 0.7$  g vs. IAV-infected  $102.9 \pm 1.9$  g,  $p < .81$ ). These observations corre-  
331        sponded well to the levels of cytokines and chemokines we detected in these mice: In the lungs,  
332        cytokines increased strongly after 4 dpi and remained elevated until 9 dpi (**Suppl. Fig. 1**). Alt-  
333        hough not reaching equally high concentrations, we also found serum levels of IFN- $\gamma$  ( $156.0 \pm$   
334         $34.4$  pg/ml, 6 dpi), IL-6 ( $37.7 \pm 11.5$  pg/ml, 6 dpi), and CCL2 ( $21.0 \pm 7.3$  pg/ml, 9 dpi) to be  
335        higher in IAV-infected mice, whereas GM-CSF and TNF remained unaltered (**Fig. 1c-j**). These  
336        observations match those from previous reports of our group, where the viral burden in the  
337        lungs of infected animals shows a strong decrease between 7 and 9 dpi and a complete clearance  
338        by 14 dpi [30].

339        In recent years, several studies have shown that systemic infection with pathogens or the appli-  
340        cation of pathogen-associated substances alone, such as endotoxin or poly(I:C), can induce  
341        sickness behavior and lead to disturbances in brain homeostasis [8, 12, 37, 38]. Given the high  
342        abundance of peripheral cytokines, we wondered whether this effect could also be seen in IAV-  
343        infected mice. Based on initial results, the time points of 7 dpi (first day of significantly different

344 body weight), 10 dpi (last day of significantly different body weight), 14 dpi (restoration of  
345 initial body weight), and 21 dpi (to evaluate potential long-term effects of IAV infection) were  
346 selected for further analyses. Consequently, to evaluate the expression of cytokines and chem-  
347 okines in the brains of naive and infected mice, brains were collected at the above-mentioned  
348 time points and dissected into Cortex (CTX) and Hippocampal formation (HPF). Reverse tran-  
349 scription qPCR (RT-qPCR) analysis revealed that upon acute IAV infection, the expression of  
350 *Il1b* (IL-1 $\beta$ ), *Il6* (IL-6), *Tnf* (TNF), and *Ccl2* (CCL2) remained unchanged (**Fig. 2a-d**). Alt-  
351 hough previous studies have demonstrated IAV/PR8/34 to be non-neurotropic [12, 13], we  
352 evaluated the viral load in the Cortex, Hippocampus, and Olfactory bulb at 7 and 10 dpi to  
353 exclude direct viral effects in the CNS of infected mice. In line with published data, we did not  
354 detect viral copies in these brain regions (**Fig. 2e**), however, despite the absence of IAV in the  
355 CNS, mRNA levels of *Ifnb1* (IFN- $\beta$ ) were elevated in the Cortex at 10 dpi ( $p < .055$ ) and sig-  
356 nificantly increased by 14 dpi. A similar trend was also observed for *Ifng* (IFN- $\gamma$ ) (**Fig. 2f, g**).  
357 As the induction of interferons often results in a plethora of immune responses ranging from  
358 the establishment of an anti-viral state in neighboring cells to modulation of the adaptive im-  
359 munity, we sought to investigate for an altered regulation of interferon-stimulated genes (ISGs).  
360 Indeed, we found the expression of the inducible GTPase *Irgm1* (IRGM1) to be significantly  
361 increased in the Cortex 10 dpi, whereas expression of other ISGs such as *Igtp* (IGTP), *Mx2*  
362 (MX2) or *Rsad2* (RSAD2) remained unaffected (**Fig. 2h-k**). In addition to anti-viral state in-  
363 duction, type I and type II interferons have been recently identified as key modulators of im-  
364 mune cell entry to the CNS during physiological but also pathological conditions by affecting  
365 the leukocyte trafficking via the blood-brain barrier (BBB) or the blood-cerebrospinal fluid  
366 barrier (BCSFB) located in the choroid plexus [39]. Interestingly, our data revealed that the  
367 gene expression of barrier-associated tight-junction proteins *Cldn5* (Claudin-5) and *Tjp1* (ZO-  
368 1) [40] was significantly altered in the Cortex and Hippocampus upon IAV infection (**Fig. 3a-**  
369 **c**). However, the expression level of the chemokines CXCL9 and CXCL10, known attractants

370 of leukocytes to the CNS [41, 42], showed no significant differences (**Fig. 3d, e**). In summary,  
371 peripheral infection with the influenza A virus led to increased gene expression of interferons  
372 in the brain combined with a reduction of tight junction proteins, suggesting an impaired func-  
373 tionality of the BBB and BCSFB.

#### 374 **IAV infection results in activation of brain-resident microglia cells**

375 Since the increased expression of cytokines can be an indicator of an induced immune response,  
376 we sought to determine whether IAV infection resulted in the emergence of microglia cell ac-  
377 tivation and neuroinflammation. Under homeostatic conditions, the majority of the brain's im-  
378 mune cell population is represented by microglia cells that perform a variety of tasks to support  
379 neuronal functions and are also known producers of type I interferons [43, 44]. During steady  
380 state, microglia are characterized by their highly ramified morphology with numerous thin pro-  
381 cesses continuously surveilling the brain parenchyma. Upon encountering pathogen- or dam-  
382 age-associated molecular patterns, these cells become activated, retract their extensions and  
383 become highly mobile while migrating towards the sites of inflammation [15].

384 Thus, sagittal paraffin sections of brains from naive and IAV-infected mice were stained for  
385 ionized calcium binding adapter molecule 1 (IBA1) and the complement receptor 3 (CD11b).  
386 Compared to naive mice, IBA1-positive cells in Cortices and Hippocampi of IAV-infected an-  
387 imals did not differ in numbers or their ramified morphology (**Fig. 4a, c**). Similarly, histological  
388 examination of CD11b-positive cells also revealed no prominent differences from controls at  
389 14 or 21 dpi (**Fig. 4b, d**). Furthermore, staining for neuronal markers MAP2 and NeuN did not  
390 indicate neuronal changes as results of IAV infection-induced neuroinflammation (**Suppl. Fig.**  
391 **2**). Yet, IBA1 and CD11b expression is not exclusive to brain-resident microglia cells as these  
392 markers can also be expressed by infiltrating monocytes or border-associated macrophages. To  
393 confirm whether the cells observed during histopathological examination indeed represent mi-  
394 croglia, we employed immunofluorescence microscopy of cryosections with staining for the

395 microglia-specific marker Transmembrane protein 119 (TMEM119) [45]. Even though  
396 TMEM119 has been reported to be a marker with robust expression, its signal did not allow a  
397 detailed evaluation of microglia morphology as it was rather present on their cellular processes  
398 but not the soma (**Fig. 4e**). However, due to the substantial overlap of signal between IBA1 and  
399 TMEM119 we concluded that the majority of IBA1-positive cells in our samples constitute of  
400 microglia (**Fig. 4f**). Hence, these cryosections from naive and IAV-infected mice were further  
401 used to compare microglia morphology in more detail. Coherent with the previous histological  
402 observations, microglia in the Cortex and Hippocampus retained their ramified morphology  
403 with thin extensions after 10 and 14 dpi. In summary, histology and fluorescence microscopy  
404 revealed no obvious evidence of pathological changes in the brain following respiratory IAV  
405 infection.

406 Microglia were previously shown to possess a diverse phenotypic spectrum with multidimen-  
407 sional activation profiles that highly depend on the microenvironmental stimuli [46, 47]. Ac-  
408 cordingly, we isolated these cells from brains of naive and IAV-infected mice to characterize  
409 their phenotype at higher resolution via multiparametric flow cytometry. After the initial re-  
410 moval of debris, we subjected all cells to unsupervised *t*-distributed stochastic neighbor embed-  
411 ding (*t*-SNE) resulting in three different clusters of cells (**Fig. 5a**) that were highly distinct in  
412 their surface expression levels of CD45, CD11b, and CX<sub>3</sub>CR1 and showed minor differences  
413 in the expression of major histocompatibility complex (MHC) class I and II, CD80, CD86, and  
414 F4/80. Using a subsequent manual gating approach, cells within the three different clusters were  
415 identified as brain-resident microglia cells (CD45<sup>low</sup>CD11b<sup>+</sup>) and peripheral immune cell sub-  
416 sets consisting of CD45<sup>hi</sup>CD11b<sup>-</sup> and CD45<sup>hi</sup>CD11b<sup>+</sup> cells (**Fig. 5b, c**). Unexpectedly, we de-  
417 tected a minor but significant increase in the frequency of CD45<sup>high</sup>CD11b<sup>+</sup> but not  
418 CD45<sup>hi</sup>CD11b<sup>-</sup> cells at 7 dpi in the brains of IAV-infected mice (**Fig. 5d-f**). As the infection  
419 progressed (10 dpi), not only CD45<sup>hi</sup>CD11b<sup>+</sup> but also more CD45<sup>hi</sup>CD11b<sup>-</sup> cells were found in



420 the Hippocampus and Cortex (CTX  $p < .06$ ) (**Fig. 5g-i**). Upon resolution of the peripheral in-  
421 fection (14 dpi), the number of CD45<sup>hi</sup>CD11b<sup>+</sup> cells returned to levels of naive controls whereas  
422 the CD45<sup>hi</sup>CD11b<sup>-</sup> cell population remained elevated in the Hippocampus of infected mice (**Fig.**  
423 **5j-l**). However, microglia constituted by far the largest population of immune cells at all time  
424 points and thus confirmed our previous immunofluorescence results.

425 After identification of microglia, we subsequently analyzed changes in their surface marker  
426 expression upon IAV infection. We discovered an upregulation of several immunological mol-  
427 ecules in both Cortex and Hippocampus 10 dpi (**Fig. 5m & Suppl. Fig. 3**): Microglia of infected  
428 mice expressed higher levels of MHC I and II, CD80, and F4/80 whereas expression of the  
429 fractalkine receptor CX<sub>3</sub>CR1 was reduced. At 14 dpi, microglial activation was still evident in  
430 both brain regions examined with significantly increased expression of MHC I and F4/80 and  
431 decreased expression of CX<sub>3</sub>CR1, respectively. However, the alterations were not as pro-  
432 nounced as before, suggesting a return to baseline levels after resolution of peripheral IAV  
433 infection. Taken together, flow cytometric analysis supported our previous findings of an al-  
434 tered BBB by revealing an elevated number of recruited peripheral immune cells in the brain  
435 parenchyma. Furthermore, activation of brain-resident microglia was increased upon IAV in-  
436 fection and remained high throughout the course of the infection.

437

### 438 **Altered synaptic pruning upon IAV infection-induced microglial activation**

439 Microglia shape neuronal connections via pruning of excessive synapses [48, 49], a process  
440 which several studies have highlighted to be a hallmark of different neurological disorders [50–  
441 52]. Of note, it has been previously demonstrated that influenza infection caused cognitive dys-  
442 function and led to an altered neuronal architecture in mice [12]. Following the aforementioned  
443 activation of microglia, we tested whether IAV infection further reactivates microglia-mediated

444 synaptic pruning by analyzing the expression of phagocytosis-associated receptors in the Cortex  
445 and Hippocampus (**Fig. 6**). While the gene expression of the scavenger receptor *Cd36* and ly-  
446 somal-associated protein *Cd68* was unaffected at 10 dpi, their expression was significantly  
447 increased upon sustained pro-inflammatory triggers (14 dpi) (**Fig. 6a, b**). Since aberrant syn-  
448 aptic pruning further requires the upregulation of complement components to tag synapses [53],  
449 we consequently examined the expression of *C1qa* and *C3* which likewise increased 14 dpi in  
450 Cortex and Hippocampus, providing the prerequisites for synapse elimination (**Fig. 6e, f**). In  
451 contrast, mRNA levels of *Trem2*, an innate immune receptor implicated in cell activation and  
452 phagocytosis [54], and the inducible nitric oxide synthase (*Nos2*) remained unaffected upon  
453 IAV infection (**Fig. 6c, d**). In conclusion, the data presented suggest the dysregulation of syn-  
454 aptic pruning and altered synaptic function following IAV infection.

#### 455 **Temporally dysregulated glutamatergic synaptic transmission and neurotrophin** 456 **gene expression following resolution of peripheral IAV infection**

457 Previously, we have demonstrated that infection-induced neuroinflammation affects synaptic  
458 protein composition with detrimental outcome for glutamatergic neurotransmission [55]. To  
459 determine whether infection with IAV may affect synaptic protein composition, we analyzed  
460 the gene expression of the presynaptic glutamate transporter *Slc17a7* (VGLUT1) over the  
461 course of infection (**Fig. 7a**). When compared to naive samples, gene expression did not differ  
462 significantly at 10 and 14 dpi, however, mRNA levels pointed towards a reduction at 14 dpi ( $p$   
463  $< .29$ ). When assessing the expression levels at 21 dpi, we detected not only a return to baseline  
464 expression but significant overcompensation. Thus, we concluded that the systemic inflamma-  
465 tion driven by peripheral IAV infection causes a functional disturbance in excitatory neurons  
466 in mice, an assumption well in line with previous reports showing altered neuronal morphology  
467 and cognitive impairment following IAV infection [12, 13]. To study synaptic changes of ex-  
468 citatory neurons more in-depth, we directly analyzed glutamatergic synapse composition. We

469 therefore developed a refined approach by taking advantage of synaptosomes, *i.e.* sealed pre-  
470 synaptic nerve terminals often containing opposite postsynaptic elements, thus providing a  
471 well-established model to investigate synapses stripped from their surrounding tissue. Protocols  
472 to isolate synaptosomes have been existent for several decades and describe the purification of  
473 synaptic material from brain tissue using discontinuous density gradient centrifugation. Upon  
474 adaption of these protocols to our samples, we first examined the content of our isolates via  
475 electron microscopy (**Fig. 7b, c**) and detected single fragments of membranes and intact pre-  
476 synapses adjacent to thickened postsynapses. The imaged synaptosomes show diameters of  
477 350-700 nm at the presynaptic side, contain zero to one mitochondrion and many small, clear  
478 synaptic vesicles. In addition, postsynaptic densities and the synaptic cleft are well noticeable,  
479 thus allowing the conclusion that our technique ensures the isolation and purification of synap-  
480 tosomes from brain tissue. Secondly, we isolated proteins from our synaptosome samples and  
481 determined the protein levels of VGLUT1 by Western blot analysis before and after IAV infec-  
482 tion (**Fig. 7d, e**). Here levels of VGLUT1 were partially diminished at 14 dpi ( $p < .09$ ) and  
483 significantly reduced 21 dpi, thus confirming previous findings by RT-qPCR.

484 So far, synaptosomes have mostly been analyzed in batches [33] and only few studies are known  
485 to employ quantitative approaches [56, 57]. To investigate synapse composition at the single  
486 synapse level, we established Flow Synaptometry, a novel, flow cytometry-based approach al-  
487 lowing a high-throughput analyses. Reportedly, synaptosomes are rather small objects with di-  
488 ameters from 0.5-2  $\mu\text{m}$  [58, 59]. To allow the size discrimination of detected events in a flow  
489 cytometer, we first established a size gate ranging from 0.3-1  $\mu\text{m}$  by utilizing fluorescent silica  
490 beads with defined diameters (**Fig. 7f**). Typically, conventional flow cytometers display a poor  
491 FSC resolution for events of such small scale. This cannot be compensated by increasing the  
492 detector sensitivity alone as this also favors the amplification of other buffer-residing objects  
493 small enough to pass through the 0.22  $\mu\text{m}$  pores of conventional sterile filters. Thus, we em-  
494 ployed the lipophilic styryl dye FM4-64 that becomes highly fluorescent when bound to lipid

495 bilayers, enabling us to distinguish cellular components from inorganic residues in the buffer  
496 and noise (**Fig. 7g**). This step was coupled to the replacement of the standard FSC-triggered  
497 detection by a fluorescence-triggered detection in the BL3 channel of our flow cytometer (not  
498 shown), now favoring only FM4-64-stained events while neglecting everything below the  
499 threshold. Besides increasing the flow cytometer's sensitivity for small events, this procedure  
500 also reduces the chance of falsely detecting aggregates of multiple synaptosomes as one event  
501 [33]. Finally, we compared the frequencies of events positive for VGLUT1 (**Fig. 7h, i**) and  
502 consistently detected a significant reduction for this protein at 21 dpi, whereas no differences  
503 appeared 14 dpi. In the light of these substantial changes, we aimed to narrow down the synap-  
504 tosome analysis on Cortex and Hippocampus of IAV-infected mice (**Fig. 8**). Therefore, the  
505 staining panel was expanded by specific markers that, in addition to the presynapse, verify the  
506 presence of postsynapses (**Fig. 8a, b**), thus allowing the simultaneous differentiation of intact  
507 synaptosomes from excitatory (Homer1) and inhibitory synapses (Gephyrin), respectively.  
508 When compared to naive mice, no differences in the frequency of excitatory Syp<sup>+</sup>Homer1<sup>+</sup> or  
509 inhibitory Syp<sup>+</sup>Gephyrin<sup>+</sup> synaptosomes were observed in animals at 14 dpi (**Fig. 8c, d**). At 21  
510 dpi, Syp<sup>+</sup>Homer1<sup>+</sup> synaptosomes appeared with higher frequency in Cortices of infected mice,  
511 whereas Syp<sup>+</sup>Gephyrin<sup>+</sup> synaptosomes were found in greater percentage in the Hippocampus.  
512 Finally, the fractions of excitatory synapses positive for either the glutamate transporter  
513 VGLUT1 or the  $\alpha$ -amino-3-hydroxy-5-methyl-4-isoxazolepropionic acid (AMPA) receptor  
514 subunit GluR1 were determined among the population of Syp<sup>+</sup>Homer1<sup>+</sup> synaptosomes. Here  
515 results from IAV-infected animals were consistent with previous findings and did not differ  
516 from naive controls at 14 dpi, but displayed a substantial loss of Syp<sup>+</sup>Homer1<sup>+</sup>VGLUT1<sup>+</sup> syn-  
517 aptosomes in the Cortex and Hippocampus at 21 dpi (**Fig. 8e**). In contrast, frequencies of  
518 Syp<sup>+</sup>Homer1<sup>+</sup>GluR1<sup>+</sup> synaptosomes from either Cortex or Hippocampus did not appear signif-  
519 icantly altered in the course of an IAV infection, although minor fluctuations were detectable.

520 Finally, we addressed the question of whether the evident synaptic changes might, at least in  
521 part, be the result of impaired neurotrophin levels. These proteins act as important mediators of  
522 neuronal survival and differentiation in the CNS and therefore play a crucial role during the  
523 development of the brain and synaptic plasticity [60, 61]. Hence, Cortices and Hippocampi of  
524 naive and infected mice were compared by RT-qPCR at different time points post IAV infec-  
525 tion. The levels of brain-derived neurotropic factor (*Bdnf*) and nerve growth factor (*Ngf*), both  
526 important mediators of neuronal differentiation and survival, did not vary until the late phase  
527 of IAV infection but changed significantly at 21 dpi (**Fig. 8g-j**). While expression of *Bdnf*  
528 showed a substantial reduction in Cortex and Hippocampus, *Ngf* was increased. Furthermore,  
529 the expression of the BDNF-specific neurotrophin receptor tropomyosin-receptor kinase B  
530 (*TrkB / Ntrk2*) was elevated in both brain regions 21 dpi. The pan-neurotrophin receptor p75<sup>NTR</sup>  
531 (*Ngfr*), known to be differentially expressed during various neurodegenerative diseases [62,  
532 63], remained unaltered throughout the course of IAV infection.

533 In summary, our data show that mRNA and protein levels of synapse components were altered  
534 upon respiratory IAV infection in mice. Furthermore, we established a novel approach to quan-  
535 tify the composition of synapses in brains by applying flow cytometry onto antibody-labelled  
536 synaptosomes. Thus, we highlighted that upon IAV infection the frequency of inhibitory syn-  
537 apses is increased while glutamatergic neurotransmission is impaired. Consistently, gene ex-  
538 pression of neurotrophins and their receptors was also altered in the brains of infected animals  
539 21 dpi as a possible consequence of a disturbed neurotransmission.

540

## 541        **8. Discussion**

542        Infections with influenza A virus affect all age groups and accumulate in annual epidemics.  
543        Usually, the infection is associated with fever, cough, and a sore throat but also induces symp-  
544        toms of sickness behavior such as weakness or decreased interest in surroundings [64]. More-  
545        over, cases of behavioral alterations in the form of narcolepsy [65] and the development of  
546        major depression [66] have been connected with IAV infection while other studies showed im-  
547        paired hippocampal neuron morphology and cognition in the presence of neuroinflammation in  
548        mice [12, 13]. Overall, various findings suggest a link between peripheral infection and the  
549        development of neuropsychiatric disorders, however, the underlying mechanisms remained  
550        largely elusive. To address this question, we infected mice with a low dose of IAV that aimed  
551        to mimic the disease progression in humans and monitored an elevated concentration of cyto-  
552        kines in lungs and sera during the first days of infection. Particularly, we detected increased  
553        levels of IL-6 and IFN- $\gamma$  between 6 and 9 dpi, which coincided with a prominent loss of body  
554        weight. These data are in line with our previous observations [30] and are the result of a cellular  
555        and humoral immune response facilitated by cytotoxic CD8<sup>+</sup> T cells, and IFN- $\gamma$ -producing NK  
556        and CD4<sup>+</sup> T helper cells that leads to diminished viral burden in the lungs [7]. Recently, the  
557        induction of peripheral inflammation through administration of LPS, poly(I:C) or IAV has been  
558        shown to cause elevated serum levels of IL-6 and TNF, which led to increased expression of  
559        inflammatory cytokines in the brain [12, 22, 67, 68]. Consequently, we assessed mRNA levels  
560        of various inflammatory cytokines but were unable to detect prominent changes for *Il1b*, *Il6*,  
561        *Tnf* or *Ccl2*. Although our data and other previous studies could show that IAV  
562        PR8/A/34(H1N1) lacks the ability to infect the brain [12, 13], we found a moderate but signif-  
563        icant increase of type I interferons (*Ifnb1*) and the IFN- $\gamma$ -inducible GTPase *Irgm1* in the Cortex  
564        of infected mice at 10 dpi. Possibly, this observation may be a consequence of activated micro-  
565        glia in response to high serum titers of inflammatory cytokines [43, 44] infiltrating the CNS via

566 the BBB [9, 10, 69]. However, the magnitude of *Ifnb1* expression levels remained considerably  
567 low and did not lead to a more restricted permeability of the BBB as observed in previous  
568 studies [70, 71]. In contrast, we found a diminished expression of genes associated with tight  
569 junction proteins of the BBB [40] at 7 dpi, shortly after serum levels of IFN- $\gamma$  peaked in IAV-  
570 infected mice. The dysregulated state of BBB and BCSFB was further indicated by the margin-  
571 ally increased frequencies of peripheral immune cells we detected in Cortex and Hippocampus  
572 between 7 and 14 dpi. These results are in line with several reports demonstrating the ability of  
573 type II interferons to downregulate the expression of tight junction proteins [72, 73]. Although  
574 IFN- $\gamma$  is further able to modify the expression of chemokines CXCL9 and CXCL10 by the BBB  
575 and BCSFB [74, 75], gene expression of *Cxcl9* or *Cxcl10* in the brain homogenate of IAV-  
576 infected mice revealed no difference in our studies in contrast with a previous report on  
577 poly(I:C)-induced release of CXCL10 by brain endothelia cells. In the latter study the authors  
578 associated the induction of sickness behavior in mice with BBB- and BCSFB-derived CXCL10,  
579 further leading to aggravated hippocampal synaptic plasticity via CXCR3 signaling in neurons  
580 [38]. Of note, both poly(I:C) and IAV infection result in RIG-I signaling cascade induction.  
581 However, only IAV is able to avoid immune responses by directly interfering with cellular  
582 signaling pathways or host gene expression that ultimately disturb induction of interferons and  
583 antiviral proteins [76–78]. Thus poly(I:C)-induced inflammation can only partially translate  
584 into effects observed in our IAV infection model and therefore further investigation on the tran-  
585 scriptome and the contribution of brain endothelia and epithelia cells to chemokine release upon  
586 IAV infection is required.

587 Despite the altered cytokine expression in the brain pointing towards the occurrence of neu-  
588 roinflammation upon peripheral infection with IAV, histological examination did not show in-  
589 flammatory foci in Cortices and Hippocampi of infected mice. In this respect, microglia number  
590 and their ramified morphology remained unaltered throughout the course of IAV infection  
591 which partially collides with data of Jurgens et al. [12] showing increased IBA1 staining and



592 reduced ramification of microglia already at 7 dpi. However, those findings may just be the  
593 result of a different genetic background (BALB/c *vs.* C57BL/6JRj) and a higher IAV inocula-  
594 tion dose as both loss of body weight and locomotive activity of mice appeared at least 2 days  
595 earlier than in our studies, using only 0.04 MLD<sub>50</sub> of IAV to induce the infection. Presumably,  
596 the immune system responds proportionally to the infection dose and in our experiments, ani-  
597 mals had only a mild loss of body weight and did not succumb to the infection. However,  
598 whether the indirect activation of microglia by peripheral challenge is dose-dependent is an  
599 interesting point that awaits further elucidation. Regardless, microglia activation can appear on  
600 multidimensional scale [46, 47] and in contrast to morphologic analyses, detailed investigation  
601 via flow cytometry allowed us to detect a moderate but significant region-specific activation  
602 indicated by increased expression of MHC I and F4/80 at 10 dpi and again at 14 dpi. These  
603 observations point towards a delayed onset of neuroinflammation following a peripheral im-  
604 mune response. Moreover, our data suggest that IAV infection induces a rather subtle and short-  
605 term inflammation in the brain, which might remain unnoticed using common histopathological  
606 approaches. Indeed, when mice infected with IAV PR8/A/34(H1N1) were assessed for possible  
607 long-term effects at 30 dpi, no signs of neuroinflammation were apparent at all [13]. In this  
608 context, a growing body of evidence has emphasized the connection between inflammation-  
609 induced activation of microglia and the recurring pruning of synapses in neurological disorders  
610 [50–52]. In addition to the prerequisite of activated microglia, synaptic pruning is depending  
611 on components of the complement system which tag synapses for a possible elimination [53,  
612 79]. In fact, we found increased expression of phagocytosis-related genes as well as upregulated  
613 mRNA levels of C1QA and C3 in IAV-infected animals. Interestingly, these results were ap-  
614 parent only at 14 dpi indicating once again temporary repercussions in the nervous system upon  
615 peripheral inflammation. In this regard, our group has previously shown the effects of neuroin-  
616 flammation on synapse integrity [55, 80]. Given the reduced expression of genes associated



617 with synapse neurotransmission we decided to test for adverse effects of IAV infection on syn-  
618 apse integrity. Establishing a novel flow cytometry-based approach to quantify the composition  
619 of synaptosomes derived from Cortices and Hippocampus allowed us to detect compelling ef-  
620 fects on presynaptic glutamatergic signaling in Cortices and Hippocampi at 21 dpi while the  
621 fraction of inhibitory synapses was increased.

622 To date, investigation of isolated synaptosomes represents a convenient tool to study the func-  
623 tion and physiology of synapses freed from their surrounding environment [58]. However, only  
624 few studies have utilized flow cytometric approaches to assess synaptosomes and in most cases  
625 only make use of one synaptic component [57, 81, 82]. Other reports focused on sorting of  
626 synaptosomes derived from fluorescent neurons [56] or applying mass cytometry and mass-  
627 coupled antibodies [83] but reporter mouse models or mass cytometers are not always featured  
628 equipment of a neuroscientific laboratory. Thus, our profound technique represents an easy-to-  
629 use alternative to previous approaches as we demonstrate that simple multiplexing is feasible  
630 using a conventional isolation procedure and standard flow cytometer. To our knowledge, our  
631 study is the first to extend previous attempts of Flow Synaptometry by simultaneously quanti-  
632 fying the relative abundance pre- and postsynaptic components in synaptosomes from different  
633 types of neurons from different brain regions. Moreover, choosing Flow Synaptometry over  
634 conventional Western blot enables to focus specifically on intact synapses, resulting in a high  
635 sensitivity while requiring only small amounts of sample material. In addition, high-throughput  
636 acquisition allows the characterization of a large number of samples within the same session  
637 and thus facilitates a high robustness of data compared to Western blot analysis.

638 So far, little is known about the direct consequences of peripheral infections or inflammation  
639 on glutamatergic signaling, but models using the viral mimic poly(I:C) discovered changed  
640 extracellular glutamate levels and synaptic transmission [84]. Furthermore, certain analogies  
641 can be found with respect to pathophysiological inflammation-induced depression. Here, low

642 levels of the neurotransmitter serotonin are assumed to play a major role and rely mainly on  
643 tryptophan availability which is in turn limited by the activity of indoleamine 2,3-dioxygenase  
644 (IDO) as a part of the kynurenine pathway [85, 86]. IDO is inducible via IFN- $\gamma$ , IL-1 $\beta$ , and IL-  
645 6 [87–89], or upon IAV infection [90]. Degradation of tryptophan occurs through IDO in pe-  
646 ripheral organs such as liver, intestine and spleen [91] but also in brain-resident microglia, as-  
647 trocytes or recruited monocytes [64, 92]. Altered levels of serotonin have been associated with  
648 a modulation of glutamatergic and GABAergic neurotransmission by altering the release of  
649 glutamate and GABA at the presynaptic side while further suppressing long-term potentiation  
650 (LTP) via inhibition of N-methyl-D-aspartate receptor (NMDA) glutamate receptor activation  
651 [93]. Although we did not detect an upregulation of IDO mRNA levels in the brains of IAV-  
652 infected mice (not shown), studies on models of LPS-induced depressive-like behavior pointed  
653 towards a considerable role of the kynurenine pathway metabolites rather than altered brain  
654 levels of serotonin [94]. Blood-derived metabolites of the kynurenine pathway can enter the  
655 brain via large neutral amino acid transporter and cause excitotoxic effects [95]. For example,  
656 levels of quinolinic acid are elevated upon peripheral inflammation [64] and functions as  
657 NMDA agonist and is found responsible for LPS-induced depression [96]. Thus, the observed  
658 change in glutamatergic neurotransmission in our study might be a consequence of dysregulated  
659 serotonin levels or the underlying tryptophan metabolism. Next to adverse effects on glutama-  
660 tergic neurotransmission, IAV infection led to an altered expression of neurotrophins and their  
661 receptors. Previously, reduced expression levels of BDNF, GDNF have been discovered in  
662 brains of IAV-infected mice [12, 97], and models of poly(I:C) and LPS administration demon-  
663 strated reduced expression of BDNF, TrkB, and NGF in Hippocampus and Cortex of mice [22,  
664 98]. On the one hand, reduced gene expression of BDNF has been associated with the develop-  
665 ment of depressive symptoms [99] and has been shown to modulate glutamatergic synaptic  
666 transmission by affecting presynaptic Ca<sup>2+</sup> levels and glutamate release as well as phosphory-

667 lation of postsynaptic NMDA receptors [100]. On the other hand, studies have shown that glu-  
668 tamate receptor activity has a reciprocal effect on neurotrophin production, hence indicating a  
669 strongly intertwined relationship [22]. Notably, inflammation-mediated dysbalance of glutama-  
670 tergic signaling has been described as a central mechanism in several neurologic disorders such  
671 as schizophrenia [101], autism spectrum disorders [102], obsessive-compulsive disorder [103]  
672 or mood disorders, and further as a comorbidity in atherosclerosis or rheumatoid arthritis [104].  
673 Overall, this study shows that peripheral IAV infection is followed by temporal effects in the  
674 brain, however, without direct manifestation in neurodegenerative processes, as shown by our  
675 histopathological examination of neuronal markers. Nevertheless, our findings contribute to the  
676 understanding how peripheral inflammation affects CNS integrity. Of note, re-infection of hu-  
677 mans with influenza is likely to occur in intervals of 10 to 20 years [1] and may culminate in  
678 neurological implications [105]. In this respect, a growing body of evidence supports the con-  
679 nection between peripheral infections and epigenetic changes in microglia which in turn render  
680 these cells to react more pro-inflammatory [106]. As a consequence, synergistic effects of mul-  
681 tiple infections acquired throughout life could lead to a previously unappreciated contribution  
682 in the development of chronic neuroinflammation, contributing to the initiation and progression  
683 of neurodegenerative diseases such as in AD or Parkinson disease (PD) [107, 108]. Correspond-  
684 ingly, previous reports identified IAV infection as a risk factor for PD or the development of  
685 PD-like symptoms [109–111].

686 Altogether, in this study we are able to demonstrate that respiratory infection with IAV  
687 PR8/A/34(H1N1) accumulates in the activation of microglia, dysbalanced glutamatergic neu-  
688 rotransmission and neurotrophin gene expression. Furthermore, we highlight the influence of  
689 peripheral inflammation on the immune cell homeostasis of the brain influencing neuronal in-  
690 tegrity. Lastly, we provide a novel and highly sensitive approach to characterize the composi-  
691 tion of synaptosomes via flow cytometry. Establishing our new method allowed us to gain fur-  
692 ther insight into the mechanisms involved in the development of neuronal alterations described

693 before, but far more allows an application to various other research domains in a future per-  
694 spective. We propose Flow Synaptometry as an additional tool, besides immunofluorescence  
695 microscopy and histological examination, to quantitatively assess the synapse integrity with  
696 high sensitivity in homeostatic conditions and to unravel modest synaptic changes during time-  
697 limited neuroinflammatory processes or the onset phases of neuroneurodegenerative condi-  
698 tions.

699

## 700 **9. Acknowledgments**

701 The authors want to thank Petra Grüneberg, Dr. Sarah Abidat Schneider, Tatjana Hirsch,  
702 Kathrin Pohlmann, Sybille Tschorn, and Dr. Christel Bonnas for their excellent technical assis-  
703 tance. We further acknowledge the support of the Combinatorial NeuroImaging Core Facility  
704 at the Leibniz Institute of Neurobiology in Magdeburg.

## 705 **10. Authors' Contributions**

706 HPD, DB, and IRD designed and organized the experiments. HPD, CAF, KS, CE, and HFZ  
707 conducted the experiments. HPD, JS, JDB, and HFZ analyzed data. HPD, CAF, JS, MK, HFZ,  
708 KHS, DD, AK, DB and IRD interpreted data. HPD, JS, AK, DB and IRD wrote the paper. AK  
709 and IRD supervised the study.

## 710 **11. Ethics Approval**

711 The study was performed in accordance with the German National Guidelines for the Use of  
712 Experimental Animals and the protocol was approved by the Landesverwaltungsamt Sachsen-  
713 Anhalt. Food and water were available *ad libitum*. All efforts were done to minimize the suf-  
714 fering of mice used in this investigation.

## 715 **12. Funding**

716 The work was supported by grants from the German Research Foundation within the CRC854  
717 (Project A25) to MK and IRD and the European Structural and Investment Funds (ESF,  
718 ZS/2016/08/80645) to IRD. Moreover, DB received funding from the German Research Foun-  
719 dation (BR2221/6-1).

720      **13. Competing Interests**

721      This study used antibodies from Synaptic Systems (Göttingen, Germany) of which CE is CEO.

722      The other authors declare no competing financial interests.

723

724 **14. References**

- 725 1. Kreijtz JHCM, Fouchier RAM, Rimmelzwaan GF (2011) Immune responses to influenza  
726 virus infection. *Virus Res* 162:19–30. <https://doi.org/10.1016/j.virusres.2011.09.022>
- 727 2. Centers for Disease Control and Prevention (2019) Seasonal Influenza (Flu): Background  
728 and Epidemiology. [https://www.cdc.gov/flu/professionals/acip/background-epidemiol-](https://www.cdc.gov/flu/professionals/acip/background-epidemiology.htm)  
729 [ogy.htm](https://www.cdc.gov/flu/professionals/acip/background-epidemiology.htm)
- 730 3. Thompson WW, Weintraub E, Dhankhar P, Cheng P-Y, Brammer L, Meltzer MI, Bresee  
731 JS, Shay DK (2009) Estimates of US influenza-associated deaths made using four different  
732 methods. *Influenza Other Respir Viruses* 3:37–49. <https://doi.org/10.1111/j.1750->  
733 [2659.2009.00073.x](https://doi.org/10.1111/j.1750-2659.2009.00073.x)
- 734 4. European Centre for Disease Prevention and Control Factsheet about seasonal influenza.  
735 <https://www.ecdc.europa.eu/en/seasonal-influenza/facts/factsheet>. Accessed 12 Apr 2021
- 736 5. European Centre for Disease Prevention and Control (2020) Seasonal influenza 2019-  
737 2020. In: ECDC (ed) Annual epidemiological report for 2019, Stockholm
- 738 6. Haller O, Staeheli P, Kochs G (2008) Protective role of interferon-induced Mx GTPases  
739 against influenza viruses. *Revue scientifique et technique (International Office of Epizo-*  
740 *otics)* 28
- 741 7. Bahadoran A, Lee SH, Wang SM, Manikam R, Rajarajeswaran J, Raju CS, Sekaran SD  
742 (2016) Immune Responses to Influenza Virus and Its Correlation to Age and Inherited  
743 Factors. *Front Microbiol* 7:1841. <https://doi.org/10.3389/fmicb.2016.01841>
- 744 8. Dantzer R (2001) Cytokine-induced sickness behavior: mechanisms and implications. *An-*  
745 *nals of the New York Academy of Sciences* 933:222–234. <https://doi.org/10.1111/j.1749->  
746 [6632.2001.tb05827.x](https://doi.org/10.1111/j.1749-6632.2001.tb05827.x)
- 747 9. Banks WA, Erickson MA (2010) The blood–brain barrier and immune function and dys-  
748 function. *Neurobiology of Disease* 37:26–32. <https://doi.org/10.1016/j.nbd.2009.07.031>

- 749 10. Pan W, Stone KP, Hsueh H, Manda VK, Zhang Y, Kastin AJ (2011) Cytokine signaling  
750 modulates blood-brain barrier function. *Curr Pharm Des* 17:3729–3740.  
751 <https://doi.org/10.2174/138161211798220918>
- 752 11. Jang H, Boltz D, McClaren J, Pani AK, Smeyne M, Korff A, Webster R, Smeyne RJ (2012)  
753 Inflammatory effects of highly pathogenic H5N1 influenza virus infection in the CNS of  
754 mice. *J Neurosci* 32:1545–1559. <https://doi.org/10.1523/JNEUROSCI.5123-11.2012>
- 755 12. Jurgens HA, Amancherla K, Johnson RW (2012) Influenza infection induces neuroinflam-  
756 mation, alters hippocampal neuron morphology, and impairs cognition in adult mice. *The*  
757 *Journal of neuroscience: the official journal of the Society for Neuroscience* 32:3958–  
758 3968. <https://doi.org/10.1523/JNEUROSCI.6389-11.2012>
- 759 13. Hosseini S, Wilk E, Michaelsen-Preusse K, Gerhauser I, Baumgärtner W, Geffers R,  
760 Schughart K, Korte M (2018) Long-Term Neuroinflammation Induced by Influenza A Vi-  
761 rus Infection and the Impact on Hippocampal Neuron Morphology and Function. *J Neuro-*  
762 *sci* 38:3060–3080. <https://doi.org/10.1523/JNEUROSCI.1740-17.2018>
- 763 14. Hosseini S, Michaelsen-Preusse K, Schughart K, Korte M (2021) Long-Term Conse-  
764 quence of Non-neurotropic H3N2 Influenza A Virus Infection for the Progression of Alz-  
765 heimer’s Disease Symptoms. *Front Cell Neurosci* 15.  
766 <https://doi.org/10.3389/fncel.2021.643650>
- 767 15. Nimmerjahn A, Kirchhoff F, Helmchen F (2005) Resting microglial cells are highly dy-  
768 namic surveillants of brain parenchyma in vivo. *Science* 308:1314–1318.  
769 <https://doi.org/10.1126/science.1110647>
- 770 16. Bar E, Barak B (2019) Microglia roles in synaptic plasticity and myelination in homeo-  
771 static conditions and neurodevelopmental disorders. *Glia* 67:2125–2141.  
772 <https://doi.org/10.1002/glia.23637>
- 773 17. Prinz M, Jung S, Priller J (2019) Microglia Biology: One Century of Evolving Concepts.  
774 *Cell* 179:292–311. <https://doi.org/10.1016/j.cell.2019.08.053>



- 775 18. Bilbo S, Stevens B (2017) Microglia: The Brain's First Responders. *Cerebrum* 2017
- 776 19. Wolf SA, Boddeke HWGM, Kettenmann H (2017) Microglia in Physiology and Disease.  
777 *Annu Rev Physiol* 79:619–643. <https://doi.org/10.1146/annurev-physiol-022516-034406>
- 778 20. Salter MW, Stevens B (2017) Microglia emerge as central players in brain disease. *Nat*  
779 *Med* 23:1018–1027. <https://doi.org/10.1038/nm.4397>
- 780 21. Li Q, Barres BA (2018) Microglia and macrophages in brain homeostasis and disease. *Nat*  
781 *Rev Immunol* 18:225–242. <https://doi.org/10.1038/nri.2017.125>
- 782 22. Gibney SM, McGuinness B, Prendergast C, Harkin A, Connor TJ (2013) Poly I:C-induced  
783 activation of the immune response is accompanied by depression and anxiety-like behav-  
784 iours, kynurenine pathway activation and reduced BDNF expression. *Brain Behav Immun*  
785 28:170–181. <https://doi.org/10.1016/j.bbi.2012.11.010>
- 786 23. Savage JC, St-Pierre M-K, Hui CW, Tremblay M-E (2019) Microglial Ultrastructure in  
787 the Hippocampus of a Lipopolysaccharide-Induced Sickness Mouse Model. *Front Neuro-*  
788 *sci* 13:1340. <https://doi.org/10.3389/fnins.2019.01340>
- 789 24. Lasselin J, Treadway MT, Lacourt TE, Soop A, Olsson MJ, Karshikoff B, Paues-Göranson  
790 S, Axelsson J, Dantzer R, Lekander M (2017) Lipopolysaccharide Alters Motivated Be-  
791 havior in a Monetary Reward Task: a Randomized Trial. *Neuropsychopharmacology*  
792 42:801–810. <https://doi.org/10.1038/npp.2016.191>
- 793 25. Stegemann S, Dahlberg S, Kröger A, Gereke M, Bruder D, Henriques-Normark B, Gunzer  
794 M, Tailleux L (2009) Increased Susceptibility for Superinfection with *Streptococcus pneu-*  
795 *moniae* during Influenza Virus Infection Is Not Caused by TLR7-Mediated Lymphopenia.  
796 *PLoS ONE* 4:e4840. <https://doi.org/10.1371/journal.pone.0004840>
- 797 26. Stegemann-Koniszewski S, Behrens S, Boehme JD, Hochnadel I, Riese P, Guzmán CA,  
798 Kröger A, Schreiber J, Gunzer M, Bruder D (2018) Respiratory Influenza A Virus Infec-  
799 tion Triggers Local and Systemic Natural Killer Cell Activation via Toll-Like Receptor 7.  
800 *Front Immunol* 9:245. <https://doi.org/10.3389/fimmu.2018.00245>

- 801 27. Düsedau HP, Klevevan J, Figueiredo CA, Biswas A, Steffen J, Kliche S, Haak S, Za-  
802 grebelsky M, Korte M, Dunay IR (2019) p75NTR regulates brain mononuclear cell func-  
803 tion and neuronal structure in Toxoplasma infection-induced neuroinflammation. *Glia*  
804 67:193–211. <https://doi.org/10.1002/glia.23553>
- 805 28. Lein ES, Hawrylycz MJ, Ao N, Ayres M, Bensinger A, Bernard A, Boe AF, Boguski MS,  
806 Brockway KS, Byrnes EJ, Chen L, Chen L, Chen T-M, Chin MC, Chong J, Crook BE,  
807 Czaplinska A, Dang CN, Datta S, Dee NR, Desaki AL, Desta T, Diep E, Dolbear TA,  
808 Donelan MJ, Dong H-W, Dougherty JG, Duncan BJ, Ebbert AJ, Eichele G, Estin LK,  
809 Faber C, Facer BA, Fields R, Fischer SR, Fliss TP, Frensley C, Gates SN, Glattfelder KJ,  
810 Halverson KR, Hart MR, Hohmann JG, Howell MP, Jeung DP, Johnson RA, Karr PT,  
811 Kawal R, Kidney JM, Knapik RH, Kuan CL, Lake JH, Laramie AR, Larsen KD, Lau C,  
812 Lemon TA, Liang AJ, Liu Y, Luong LT, Michaels J, Morgan JJ, Morgan RJ, Mortrud MT,  
813 Mosqueda NF, Ng LL, Ng R, Orta GJ, Overly CC, Pak TH, Parry SE, Pathak SD, Pearson  
814 OC, Puchalski RB, Riley ZL, Rockett HR, Rowland SA, Royall JJ, Ruiz MJ, Sarno NR,  
815 Schaffnit K, Shapovalova NV, Svisay T, Slaughterbeck CR, Smith SC, Smith KA, Smith  
816 BI, Sodt AJ, Stewart NN, Stumpf K-R, Sunkin SM, Sutram M, Tam A, Teemer CD, Thaller  
817 C, Thompson CL, Varnam LR, Visel A, Whitlock RM, Wohnoutka PE, Wolkey CK, Wong  
818 VY, Wood M, Yaylaoglu MB, Young RC, Youngstrom BL, Yuan XF, Zhang B, Zwing-  
819 man TA, Jones AR (2007) Genome-wide atlas of gene expression in the adult mouse brain.  
820 *Nature* 445:168–176. <https://doi.org/10.1038/nature05453>
- 821 29. Figueiredo CA, Düsedau HP, Steffen J, Gupta N, Dunay MP, Toth GK, Reglodi D,  
822 Heimesaat MM, Dunay IR (2019) Immunomodulatory Effects of the Neuropeptide Pitui-  
823 tary Adenylate Cyclase-Activating Polypeptide in Acute Toxoplasmosis. *Front Cell Infect*  
824 *Microbiol* 9:154. <https://doi.org/10.3389/fcimb.2019.00154>
- 825 30. Sharma-Chawla N, Sender V, Kershaw O, Gruber AD, Volckmar J, Henriques-Normark  
826 B, Stegemann-Koniszewski S, Bruder D (2016) Influenza A Virus Infection Predisposes

- 827 Hosts to Secondary Infection with Different *Streptococcus pneumoniae* Serotypes with  
828 Similar Outcome but Serotype-Specific Manifestation. *Infect Immun* 84:3445–3457.  
829 <https://doi.org/10.1128/IAI.00422-16>
- 830 31. Schindelin J, Arganda-Carreras I, Frise E, Kaynig V, Longair M, Pietzsch T, Preibisch S,  
831 Rueden C, Saalfeld S, Schmid B, Tinevez J-Y, White DJ, Hartenstein V, Eliceiri K, To-  
832 mancak P, Cardona A (2012) Fiji: An open-source platform for biological-image analysis.  
833 *Nat Methods* 9:676–682. <https://doi.org/10.1038/nmeth.2019>
- 834 32. Smalla K-H, Klemmer P, Wyneken U (2013) Isolation of the Postsynaptic Density: A Spe-  
835 cialization of the Subsynaptic Cytoskeleton. In: Dermietzel R (ed) *The cytoskeleton: Im-*  
836 *aging, isolation, and interaction*, vol 79. Humana Press, New York, pp 265–280
- 837 33. Hobson BD, Sims PA (2019) Critical Analysis of Particle Detection Artifacts in Synapto-  
838 some Flow Cytometry. *eNeuro* 6. <https://doi.org/10.1523/ENEURO.0009-19.2019>
- 839 34. Breukel AI, Besselsen E, Ghijsen WE (1997) Synaptosomes. A model system to study  
840 release of multiple classes of neurotransmitters. *Methods Mol Biol* 72:33–47.  
841 <https://doi.org/10.1385/0-89603-394-5:33>
- 842 35. R Core Team (2020) *R: A language and environment for statistical computing*. R Founda-  
843 tion for Statistical Computing, Vienna, Austria
- 844 36. Sarkar D (2008) *Lattice: Multivariate Data Visualization with R*. Springer New York, New  
845 York, NY
- 846 37. Layé S, Parnet P, Goujon E, Dantzer R (1994) Peripheral administration of lipopolysac-  
847 charide induces the expression of cytokine transcripts in the brain and pituitary of mice.  
848 *Molecular Brain Research* 27:157–162. [https://doi.org/10.1016/0169-328X\(94\)90197-X](https://doi.org/10.1016/0169-328X(94)90197-X)
- 849 38. Blank T, Detje CN, Spieß A, Hagemeyer N, Brendecke SM, Wolfart J, Staszewski O,  
850 Zöllner T, Papageorgiou I, Schneider J, Paricio-Montesinos R, Eisel ULM, Manahan-  
851 Vaughan D, Jansen S, Lienenklaus S, Lu B, Imai Y, Müller M, Goelz SE, Baker DP,  
852 Schwaninger M, Kann O, Heikenwalder M, Kalinke U, Prinz M (2016) Brain Endothelial-

- 853 and Epithelial-Specific Interferon Receptor Chain 1 Drives Virus-Induced Sickness Be-  
854 havior and Cognitive Impairment. *Immunity* 44:901–912. <https://doi.org/10.1016/j.im->  
855 [muni.2016.04.005](https://doi.org/10.1016/j.immuni.2016.04.005)
- 856 39. Daniels BP, Holman DW, Cruz-Orengo L, Jujavarapu H, Durrant DM, Klein RS (2014)  
857 Viral pathogen-associated molecular patterns regulate blood-brain barrier integrity via  
858 competing innate cytokine signals. *mBio* 5:e01476-14.  
859 <https://doi.org/10.1128/mBio.01476-14>
- 860 40. Dyrna F, Hanske S, Krueger M, Bechmann I (2013) The blood-brain barrier. *J Neuroim-*  
861 *mune Pharmacol* 8:763–773. <https://doi.org/10.1007/s11481-013-9473-5>
- 862 41. Klein RS, Lin E, Zhang B, Luster AD, Tollett J, Samuel MA, Engle M, Diamond MS  
863 (2005) Neuronal CXCL10 directs CD8<sup>+</sup> T-cell recruitment and control of West Nile virus  
864 encephalitis. *Journal of Virology* 79:11457–11466.  
865 <https://doi.org/10.1128/JVI.79.17.11457-11466.2005>
- 866 42. Zhang B, Chan YK, Lu B, Diamond MS, Klein RS (2008) CXCR3 mediates region-spe-  
867 cific antiviral T cell trafficking within the central nervous system during West Nile virus  
868 encephalitis. *J Immunol* 180:2641–2649. <https://doi.org/10.4049/jimmunol.180.4.2641>
- 869 43. Kallfass C, Ackerman A, Lienenklaus S, Weiss S, Heimrich B, Staeheli P (2012) Visual-  
870 izing production of beta interferon by astrocytes and microglia in brain of La Crosse virus-  
871 infected mice. *Journal of Virology* 86:11223–11230. <https://doi.org/10.1128/JVI.01093->  
872 [12](https://doi.org/10.1128/JVI.01093-12)
- 873 44. Owens T, Khoroshi R, Wlodarczyk A, Asgari N (2014) Interferons in the central nervous  
874 system: a few instruments play many tunes. *Glia* 62:339–355.  
875 <https://doi.org/10.1002/glia.22608>
- 876 45. Bennett ML, Bennett FC, Liddel SA, Ajami B, Zamanian JL, Fernhoff NB, Mulinyawe  
877 SB, Bohlen CJ, Adil A, Tucker A, Weissman IL, Chang EF, Li G, Grant GA, Hayden

- 878 Gephart MG, Barres BA (2016) New tools for studying microglia in the mouse and human  
879 CNS. *Proc Natl Acad Sci U S A* 113:E1738-46. <https://doi.org/10.1073/pnas.1525528113>
- 880 46. Ransohoff RM (2016) A polarizing question: do M1 and M2 microglia exist? *Nat Neurosci*  
881 19:987–991. <https://doi.org/10.1038/nn.4338>
- 882 47. Dubbelaar ML, Kracht L, Eggen BJL, Boddeke EWGM (2018) The Kaleidoscope of Mi-  
883 croglial Phenotypes. *Front Immunol* 9:1753. <https://doi.org/10.3389/fimmu.2018.01753>
- 884 48. Kettenmann H, Kirchhoff F, Verkhratsky A (2013) Microglia: new roles for the synaptic  
885 stripper. *Neuron* 77:10–18. <https://doi.org/10.1016/j.neuron.2012.12.023>
- 886 49. Brown GC, Neher JJ (2014) Microglial phagocytosis of live neurons. *Nat Rev Neurosci*  
887 15:209–216. <https://doi.org/10.1038/nrn3710>
- 888 50. Kim H-J, Cho M-H, Shim WH, Kim JK, Jeon E-Y, Kim D-H, Yoon S-Y (2017) Deficient  
889 autophagy in microglia impairs synaptic pruning and causes social behavioral defects. *Mol*  
890 *Psychiatry* 22:1576–1584. <https://doi.org/10.1038/mp.2016.103>
- 891 51. Neniskyte U, Gross CT (2017) Errant gardeners: glial-cell-dependent synaptic pruning and  
892 neurodevelopmental disorders. *Nat Rev Neurosci* 18:658–670.  
893 <https://doi.org/10.1038/nrn.2017.110>
- 894 52. Sellgren CM, Gracias J, Watmuff B, Biag JD, Thanos JM, Whittredge PB, Fu T, Worringer  
895 K, Brown HE, Wang J, Kaykas A, Karmacharya R, Goold CP, Sheridan SD, Perlis RH  
896 (2019) Increased synapse elimination by microglia in schizophrenia patient-derived mod-  
897 els of synaptic pruning. *Nat Neurosci* 22:374–385. [https://doi.org/10.1038/s41593-018-](https://doi.org/10.1038/s41593-018-0334-7)  
898 [0334-7](https://doi.org/10.1038/s41593-018-0334-7)
- 899 53. Stevens B, Allen NJ, Vazquez LE, Howell GR, Christopherson KS, Nouri N, Micheva KD,  
900 Mehalow AK, Huberman AD, Stafford B, Sher A, Litke AM, Lambris JD, Smith SJ, John  
901 SWM, Barres BA (2007) The classical complement cascade mediates CNS synapse elim-  
902 ination. *Cell* 131:1164–1178. <https://doi.org/10.1016/j.cell.2007.10.036>

- 903 54. Kober DL, Brett TJ (2017) TREM2-Ligand Interactions in Health and Disease. *J Mol Biol*  
904 429:1607–1629. <https://doi.org/10.1016/j.jmb.2017.04.004>
- 905 55. Lang D, Schott BH, van Ham M, Morton L, Kulikovskaja L, Herrera-Molina R, Pielot R,  
906 Klawonn F, Montag D, Jänsch L, Gundelfinger ED, Smalla KH, Dunay IR (2018) Chronic  
907 *Toxoplasma* infection is associated with distinct alterations in the synaptic protein compo-  
908 sition. *J Neuroinflammation* 15:438. <https://doi.org/10.1186/s12974-018-1242-1>
- 909 56. Biesemann C, Grønborg M, Luquet E, Wichert SP, Bernard V, Bungers SR, Cooper B,  
910 Varoquaux F, Li L, Byrne JA, Urlaub H, Jahn O, Brose N, Herzog E (2014) Proteomic  
911 screening of glutamatergic mouse brain synaptosomes isolated by fluorescence activated  
912 sorting. *EMBO J* 33:157–170. <https://doi.org/10.1002/emboj.201386120>
- 913 57. Gylys KH, Bilousova T (2017) Flow Cytometry Analysis and Quantitative Characteriza-  
914 tion of Tau in Synaptosomes from Alzheimer's Disease Brains. *Methods Mol Biol*  
915 1523:273–284. [https://doi.org/10.1007/978-1-4939-6598-4\\_16](https://doi.org/10.1007/978-1-4939-6598-4_16)
- 916 58. Gray EG, Whittaker VP (1962) The isolation of nerve endings from brain: an electron-  
917 microscopic study of cell fragments derived by homogenization and centrifugation. *J Anat-*  
918 *omy* 96:79–88
- 919 59. Dunkley PR, Jarvie PE, Heath JW, Kidd GJ, Rostas JA (1986) A rapid method for isolation  
920 of synaptosomes on Percoll gradients. *Brain Research* 372:115–129.  
921 [https://doi.org/10.1016/0006-8993\(86\)91464-2](https://doi.org/10.1016/0006-8993(86)91464-2)
- 922 60. Chao MV (2003) Neurotrophins and their receptors: a convergence point for many signal-  
923 ling pathways. *Nat Rev Neurosci* 4:299–309. <https://doi.org/10.1038/nrn1078>
- 924 61. Cunha C, Brambilla R, Thomas KL (2010) A simple role for BDNF in learning and  
925 memory? *Front Mol Neurosci* 3:1. <https://doi.org/10.3389/neuro.02.001.2010>
- 926 62. Meeker R, Williams K (2014) Dynamic nature of the p75 neurotrophin receptor in response  
927 to injury and disease. *J Neuroimmune Pharmacol* 9:615–628.  
928 <https://doi.org/10.1007/s11481-014-9566-9>

- 929 63. Ibáñez CF, Simi A (2012) p75 neurotrophin receptor signaling in nervous system injury  
930 and degeneration: Paradox and opportunity. *Trends Neurosci* 35:431–440.  
931 <https://doi.org/10.1016/j.tins.2012.03.007>
- 932 64. Müller N, Schwarz MJ (2007) The immune-mediated alteration of serotonin and gluta-  
933 mate: towards an integrated view of depression. *Mol Psychiatry* 12:988–1000.  
934 <https://doi.org/10.1038/sj.mp.4002006>
- 935 65. Zhang XZ, Penzel T, Han F (2013) Increased incidence of narcolepsy following the 2009  
936 H1N1 pandemic. *Somnologie* 17:90–93. <https://doi.org/10.1007/s11818-013-0619-8>
- 937 66. Bornand D, Toovey S, Jick SS, Meier CR (2016) The risk of new onset depression in  
938 association with influenza--A population-based observational study. *Brain Behav Immun*  
939 53:131–137. <https://doi.org/10.1016/j.bbi.2015.12.005>
- 940 67. Cai KC, van Mil S, Murray E, Mallet J-F, Matar C, Ismail N (2016) Age and sex differ-  
941 ences in immune response following LPS treatment in mice. *Brain Behav Immun* 58:327–  
942 337. <https://doi.org/10.1016/j.bbi.2016.08.002>
- 943 68. Gandhi R, Hayley S, Gibb J, Merali Z, Anisman H (2007) Influence of poly I:C on sickness  
944 behaviors, plasma cytokines, corticosterone and central monoamine activity: moderation  
945 by social stressors. *Brain Behav Immun* 21:477–489.  
946 <https://doi.org/10.1016/j.bbi.2006.12.005>
- 947 69. Dantzer R, O'Connor JC, Freund GG, Johnson RW, Kelley KW (2008) From inflammation  
948 to sickness and depression: when the immune system subjugates the brain. *Nat Rev Neu-*  
949 *rosci* 9:46–56. <https://doi.org/10.1038/nrn2297>
- 950 70. Kraus J, Voigt K, Schuller AM, Scholz M, Kim KS, Schilling M, Schäbitz WR, Oschmann  
951 P, Engelhardt B (2008) Interferon-beta stabilizes barrier characteristics of the blood-brain  
952 barrier in four different species in vitro. *Mult Scler* 14:843–852.  
953 <https://doi.org/10.1177/1352458508088940>



- 954 71. Veldhuis WB, Floris S, van der Meide PH, Vos IMP, Vries HE de, Dijkstra CD, Bär PR,  
955 Nicolay K (2003) Interferon-beta prevents cytokine-induced neutrophil infiltration and at-  
956 tenuates blood-brain barrier disruption. *J Cereb Blood Flow Metab* 23:1060–1069.  
957 <https://doi.org/10.1097/01.WCB.0000080701.47016.24>
- 958 72. Chai Q, He WQ, Zhou M, Lu H, Fu ZF (2014) Enhancement of blood-brain barrier per-  
959 meability and reduction of tight junction protein expression are modulated by chemo-  
960 kines/cytokines induced by rabies virus infection. *Journal of Virology* 88:4698–4710.  
961 <https://doi.org/10.1128/JVI.03149-13>
- 962 73. Utech M, Ivanov AI, Samarin SN, Bruewer M, Turner JR, Mrsny RJ, Parkos CA, Nusrat  
963 A (2005) Mechanism of IFN-gamma-induced endocytosis of tight junction proteins: myo-  
964 sin II-dependent vacuolarization of the apical plasma membrane. *Mol Biol Cell* 16:5040–  
965 5052. <https://doi.org/10.1091/mbc.e05-03-0193>
- 966 74. Monteiro S, Roque S, Marques F, Correia-Neves M, Cerqueira JJ (2017) Brain interfer-  
967 ence: Revisiting the role of IFN $\gamma$  in the central nervous system. *Progress in Neurobiology*  
968 156:149–163. <https://doi.org/10.1016/j.pneurobio.2017.05.003>
- 969 75. Loos T, Dekeyzer L, Struyf S, Schutyser E, Gijsbers K, Gouwy M, Fraeyman A, Put W,  
970 Ronsse I, Grillet B, Opendakker G, van Damme J, Proost P (2006) TLR ligands and cyto-  
971 kines induce CXCR3 ligands in endothelial cells: enhanced CXCL9 in autoimmune arthri-  
972 tis. *Lab Invest* 86:902–916. <https://doi.org/10.1038/labinvest.3700453>
- 973 76. Gack MU, Albrecht RA, Urano T, Inn K-S, Huang I-C, Carnero E, Farzan M, Inoue S,  
974 Jung JU, García-Sastre A (2009) Influenza A virus NS1 targets the ubiquitin ligase  
975 TRIM25 to evade recognition by the host viral RNA sensor RIG-I. *Cell Host Microbe*  
976 5:439–449. <https://doi.org/10.1016/j.chom.2009.04.006>
- 977 77. Chung W-C, Kang H-R, Yoon H, Kang S-J, Ting JP-Y, Song MJ (2015) Influenza A Virus  
978 NS1 Protein Inhibits the NLRP3 Inflammasome. *PLoS ONE* 10:e0126456.  
979 <https://doi.org/10.1371/journal.pone.0126456>



- 980 78. Oishi K, Yamayoshi S, Kawaoka Y (2015) Mapping of a Region of the PA-X Protein of  
981 Influenza A Virus That Is Important for Its Shutoff Activity. *Journal of Virology* 89:8661–  
982 8665. <https://doi.org/10.1128/JVI.01132-15>
- 983 79. Vasek MJ, Garber C, Dorsey D, Durrant DM, Bollman B, Soung A, Yu J, Perez-Torres C,  
984 Frouin A, Wilton DK, Funk K, DeMasters BK, Jiang X, Bowen JR, Mennerick S, Robin-  
985 son JK, Garbow JR, Tyler KL, Suthar MS, Schmidt RE, Stevens B, Klein RS (2016) A  
986 complement-microglial axis drives synapse loss during virus-induced memory impair-  
987 ment. *Nature* 534:538–543. <https://doi.org/10.1038/nature18283>
- 988 80. French T, Düsedau HP, Steffen J, Biswas A, Ahmed N, Hartmann S, Schüler T, Schott  
989 BH, Dunay IR (2019) Neuronal impairment following chronic *Toxoplasma gondii* infec-  
990 tion is aggravated by intestinal nematode challenge in an IFN- $\gamma$ -dependent manner. *J Neu-*  
991 *roinflammation* 16:159. <https://doi.org/10.1186/s12974-019-1539-8>
- 992 81. Postupna NO, Keene CD, Latimer C, Sherfield EE, van Gelder RD, Ojemann JG, Montine  
993 TJ, Darvas M (2014) Flow cytometry analysis of synaptosomes from post-mortem human  
994 brain reveals changes specific to Lewy body and Alzheimer's disease. *Lab Invest* 94:1161–  
995 1172. <https://doi.org/10.1038/labinvest.2014.103>
- 996 82. Postupna NO, Latimer CS, Keene CD, Montine KS, Montine TJ, Darvas M (2018) Flow  
997 cytometric evaluation of crude synaptosome preparation as a way to study synaptic altera-  
998 tion in neurodegenerative diseases. *Neuromethods* 141:297–310.  
999 [https://doi.org/10.1007/978-1-4939-8739-9\\_17](https://doi.org/10.1007/978-1-4939-8739-9_17)
- 1000 83. Gajera CR, Fernandez R, Montine KS, Fox EJ, Mrdjen D, Postupna NO, Keene CD, Ben-  
1001 dall SC, Montine TJ (2021) Mass-tag barcoding for multiplexed analysis of human synap-  
1002 tosomes and other anuclear events. *Cytometry A*. <https://doi.org/10.1002/cyto.a.24340>

- 1003 84. Hunsberger HC, Wang D, Petrisko TJ, Alhowail A, Setti SE, Suppiramaniam V, Konat  
1004 GW, Reed MN (2016) Peripherally restricted viral challenge elevates extracellular gluta-  
1005 mate and enhances synaptic transmission in the hippocampus. *J Neurochem* 138:307–316.  
1006 <https://doi.org/10.1111/jnc.13665>
- 1007 85. Stone TW, Darlington LG (2002) Endogenous kynurenines as targets for drug discovery  
1008 and development. *Nat Rev Drug Discov* 1:609–620. <https://doi.org/10.1038/nrd870>
- 1009 86. Jeon SW, Kim Y-K (2017) Inflammation-induced depression: Its pathophysiology and  
1010 therapeutic implications. *J Neuroimmunol* 313:92–98. <https://doi.org/10.1016/j.jneu->  
1011 [roim.2017.10.016](https://doi.org/10.1016/j.jneu-2017.10.016)
- 1012 87. Carlin JM, Borden EC, Sondel PM, Byrne GI (1989) Interferon-induced indoleamine 2,3-  
1013 dioxygenase activity in human mononuclear phagocytes. *J Leukoc Biol* 45:29–34.  
1014 <https://doi.org/10.1002/jlb.45.1.29>
- 1015 88. Fujigaki H, Saito K, Fujigaki S, Takemura M, Sudo K, Ishiguro H, Seishima M (2006) The  
1016 signal transducer and activator of transcription 1alpha and interferon regulatory factor 1  
1017 are not essential for the induction of indoleamine 2,3-dioxygenase by lipopolysaccharide:  
1018 involvement of p38 mitogen-activated protein kinase and nuclear factor-kappaB pathways,  
1019 and synergistic effect of several proinflammatory cytokines. *J Biochem* 139:655–662.  
1020 <https://doi.org/10.1093/jb/mvj072>
- 1021 89. Zunszain PA, Anacker C, Cattaneo A, Choudhury S, Musaelyan K, Myint AM, Thuret S,  
1022 Price J, Pariante CM (2012) Interleukin-1 $\beta$ : a new regulator of the kynurenine pathway  
1023 affecting human hippocampal neurogenesis. *Neuropsychopharmacology* 37:939–949.  
1024 <https://doi.org/10.1038/npp.2011.277>
- 1025 90. Gaelings L, Söderholm S, Bugai A, Fu Y, Nandania J, Schepens B, Lorey MB, Tynell J,  
1026 Vande Ginste L, Le Goffic R, Miller MS, Kuisma M, Marjomäki V, Brabander J de, Mat-  
1027 ikainen S, Nyman TA, Bamford DH, Saelens X, Julkunen I, Paavilainen H, Hukkanen V,

- 1028 Velagapudi V, Kainov DE (2017) Regulation of kynurenine biosynthesis during influenza  
1029 virus infection. *FEBS J* 284:222–236. <https://doi.org/10.1111/febs.13966>
- 1030 91. Baumgartner R, Forteza MJ, Ketelhuth DFJ (2019) The interplay between cytokines and  
1031 the Kynurenine pathway in inflammation and atherosclerosis. *Cytokine* 122:154148.  
1032 <https://doi.org/10.1016/j.cyto.2017.09.004>
- 1033 92. Suh H-S, Zhao M-L, Riviaccio M, Choi S, Connolly E, Zhao Y, Takikawa O, Brosnan CF,  
1034 Lee SC (2007) Astrocyte indoleamine 2,3-dioxygenase is induced by the TLR3 ligand  
1035 poly(I:C): mechanism of induction and role in antiviral response. *Journal of Virology*  
1036 81:9838–9850. <https://doi.org/10.1128/JVI.00792-07>
- 1037 93. Ciranna L (2006) Serotonin as a modulator of glutamate- and GABA-mediated neurotrans-  
1038 mission: implications in physiological functions and in pathology. *Curr Neuropharmacol*  
1039 4:101–114. <https://doi.org/10.2174/157015906776359540>
- 1040 94. O'Connor JC, Lawson MA, André C, Moreau M, Lestage J, Castanon N, Kelley KW, Dan-  
1041 tzer R (2009) Lipopolysaccharide-induced depressive-like behavior is mediated by in-  
1042 doleamine 2,3-dioxygenase activation in mice. *Mol Psychiatry* 14:511–522.  
1043 <https://doi.org/10.1038/sj.mp.4002148>
- 1044 95. Schwarcz R, Stone TW (2017) The kynurenine pathway and the brain: Challenges, con-  
1045 troversies and promises. *Neuropharmacology* 112:237–247. <https://doi.org/10.1016/j.neuropharm.2016.08.003>
- 1047 96. Walker AK, Budac DP, Bisulco S, Lee AW, Smith RA, Beenders B, Kelley KW, Dantzer  
1048 R (2013) NMDA receptor blockade by ketamine abrogates lipopolysaccharide-induced de-  
1049 pressive-like behavior in C57BL/6J mice. *Neuropsychopharmacology* 38:1609–1616.  
1050 <https://doi.org/10.1038/npp.2013.71>
- 1051 97. Sadasivan S, Zanin M, O'Brien K, Schultz-Cherry S, Smeyne RJ (2015) Induction of mi-  
1052 croglia activation after infection with the non-neurotropic A/CA/04/2009 H1N1 influenza  
1053 virus. *PLoS ONE* 10:e0124047. <https://doi.org/10.1371/journal.pone.0124047>

- 1054 98. Guan Z, Fang J (2006) Peripheral immune activation by lipopolysaccharide decreases neu-  
1055 rotrophins in the cortex and hippocampus in rats. *Brain Behav Immun* 20:64–71.  
1056 <https://doi.org/10.1016/j.bbi.2005.04.005>
- 1057 99. Martinowich K, Manji H, Lu B (2007) New insights into BDNF function in depression and  
1058 anxiety. *Nat Neurosci* 10:1089–1093. <https://doi.org/10.1038/nn1971>
- 1059 100. Leßmann V (1998) Neurotrophin-Dependent Modulation of Glutamatergic Synaptic  
1060 Transmission in the Mammalian CNS. *General Pharmacology: The Vascular System*  
1061 31:667–674. [https://doi.org/10.1016/S0306-3623\(98\)00190-6](https://doi.org/10.1016/S0306-3623(98)00190-6)
- 1062 101. Müller N, Schwarz M (2006) Schizophrenia as an inflammation-mediated dysbalance of  
1063 glutamatergic neurotransmission. *Neurotox Res* 10:131–148.  
1064 <https://doi.org/10.1007/BF03033242>
- 1065 102. Blaylock RL, Strunecka A (2009) Immune-glutamatergic dysfunction as a central mecha-  
1066 nism of the autism spectrum disorders. *Curr Med Chem* 16:157–170.  
1067 <https://doi.org/10.2174/092986709787002745>
- 1068 103. Ting JT, Feng G (2008) Glutamatergic Synaptic Dysfunction and Obsessive-Compulsive  
1069 Disorder. *Curr Chem Genomics* 2:62–75. <https://doi.org/10.2174/1875397300802010062>
- 1070 104. Evans DL, Charney DS, Lewis L, Golden RN, Gorman JM, Krishnan KRR, Nemeroff CB,  
1071 Bremner JD, Carney RM, Coyne JC, Delong MR, Frasure-Smith N, Glassman AH, Gold  
1072 PW, Grant I, Gwyther L, Ironson G, Johnson RL, Kanner AM, Katon WJ, Kaufmann PG,  
1073 Keefe FJ, Ketter T, Laughren TP, Leserman J, Lyketsos CG, McDonald WM, McEwen  
1074 BS, Miller AH, Musselman D, O'Connor C, Petitto JM, Pollock BG, Robinson RG, Roose  
1075 SP, Rowland J, Sheline Y, Sheps DS, Simon G, Spiegel D, Stunkard A, Sunderland T,  
1076 Tibbits P, Valvo WJ (2005) Mood disorders in the medically ill: scientific review and rec-  
1077 ommendations. *Biol Psychiatry* 58:175–189. <https://doi.org/10.1016/j.bi->  
1078 [opsych.2005.05.001](https://doi.org/10.1016/j.biopsych.2005.05.001)

- 1079 105. Hosp JA, Dressing A, Blazhenets G, Bormann T, Rau A, Schwabenland M, Thurow J,  
1080 Wagner D, Waller C, Niesen WD, Frings L, Urbach H, Prinz M, Weiller C, Schroeter N,  
1081 Meyer PT (2021) Cognitive impairment and altered cerebral glucose metabolism in the  
1082 subacute stage of COVID-19. *Brain*. <https://doi.org/10.1093/brain/awab009>
- 1083 106. Haley MJ, Brough D, Quintin J, Allan SM (2019) Microglial Priming as Trained Immunity  
1084 in the Brain. *Neuroscience* 405:47–54. <https://doi.org/10.1016/j.neuroscience.2017.12.039>
- 1085 107. Kempuraj D, Thangavel R, Natteru PA, Selvakumar GP, Saeed D, Zahoor H, Zaheer S,  
1086 Iyer SS, Zaheer A (2016) Neuroinflammation Induces Neurodegeneration. *J Neurol Neu-*  
1087 *rosurg Spine* 1
- 1088 108. Ransohoff RM (2016) How neuroinflammation contributes to neurodegeneration. *Science*  
1089 353:777–783. <https://doi.org/10.1126/science.aag2590>
- 1090 109. Sadasivan S, Sharp B, Schultz-Cherry S, Smeyne RJ (2017) Synergistic effects of influ-  
1091 enza and 1-methyl-4-phenyl-1,2,3,6-tetrahydropyridine (MPTP) can be eliminated by the  
1092 use of influenza therapeutics: experimental evidence for the multi-hit hypothesis. *NPJ*  
1093 *Parkinsons Dis* 3:18. <https://doi.org/10.1038/s41531-017-0019-z>
- 1094 110. Toovey S, Jick SS, Meier CR (2011) Parkinson's disease or Parkinson symptoms following  
1095 seasonal influenza. *Influenza Other Respir Viruses* 5:328–333.  
1096 <https://doi.org/10.1111/j.1750-2659.2011.00232.x>
- 1097 111. Tulisak CT, Mercado G, Peelaerts W, Brundin L, Brundin P (2019) Can infections trigger  
1098 alpha-synucleinopathies? *Prog Mol Biol Transl Sci* 168:299–322.  
1099 <https://doi.org/10.1016/bs.pmbts.2019.06.002>

1100

1101 **15. Tables**

1102 **Table 1: TaqMan® Assays used for RT-qPCR analyses**

| Protein            | Gene  | Assay ID      |
|--------------------|-------|---------------|
| BDNF               | Bdnf  | Mm04230607_s1 |
| C1qa               | C1qa  | Mm00432142_m1 |
| C3                 | C3    | Mm01232779_m1 |
| CCL2               | Ccl2  | Mm00441242_m1 |
| CD36               | Cd36  | Mm00432403_m1 |
| CD68               | Cd68  | Mm03047343_m1 |
| Claudin-5          | Cldn5 | Mm00727012_s1 |
| HPRT               | Hprt  | Mm01545399_m1 |
| IDO                | Ido1  | Mm00492586_s1 |
| IFN- $\beta$       | Ifnb1 | Mm00439552_s1 |
| IFN- $\gamma$      | Ifng  | Mm00801778_m1 |
| IGTP               | Igtp  | Mm00497611_m1 |
| IL-1 $\beta$       | Il1b  | Mm00434228_m1 |
| IL-6               | Il6   | Mm00446190_m1 |
| iNOS               | Nos2  | Mm00440485_m1 |
| NGF                | Ngf   | Mm00443039_m1 |
| IRGM1              | Irgm1 | Mm00492596_m1 |
| p75 <sup>NTR</sup> | Ngfr  | Mm01309638_m1 |
| TNF                | Tnf   | Mm00443258_m1 |
| TREM-2             | Trem2 | Mm04209422_m1 |
| TrkB               | Ntrk2 | Mm00435422_m1 |

|        |         |               |
|--------|---------|---------------|
| VGLUT1 | Slc17a7 | Mm00812886_m1 |
| ZO-1   | Tjp1    | Mm00493699_m1 |

1103

1104 **Table 2: Self-designed primer sequences used for RT-qPCR analyses**

| Protein        | Gene   | Species           |    | Sequence (5' to 3')           |
|----------------|--------|-------------------|----|-------------------------------|
| Claudin-1      | Cldn1  | Mus musculus      | Fw | ACTCCTTGCTGAATCTGAACAGT       |
|                |        |                   | Rv | GGACACAAAGATTGCGATCAG         |
| CXCL9          | Cxcl9  | Mus musculus      | Fw | GAGTTCGAGGAACCCTAGTG          |
|                |        |                   | Rv | AACTGTTTGAGGTCTTTGAGG         |
| CXCL10         | Cxcl10 | Mus musculus      | Fw | AACTGCATCCATATCGATGAC         |
|                |        |                   | Rv | GTGGCAATGATCTCAACAC           |
| HPRT           | Hprt   | Mus musculus      | Fw | GCTATAAATTCTTTGCTGACCTGCTG    |
|                |        |                   | Rv | AATTACTTTTATGTCCCCTGTT-GACTGG |
| MX2            | Mx2    | Mus musculus      | Fw | TCACCAGAGTGCAAGTGAGG          |
|                |        |                   | Rv | CATTCTCCCTCTGCCACATT          |
| RSAD2          | Rsad2  | Mus musculus      | Fw | GTCCTGTTTGGTGCCTGAAT          |
|                |        |                   | Rv | GCCACGCTTCAGAAACATCT          |
| Nucleo-protein | NP     | Influenza A virus | Fw | GAGGGGTGAGAATGGACGAAAAAC      |
|                |        |                   | Rv | CAGGCAGGCAGGCAGGACTT          |

1105



## 1106 16. Figure legends

### 1107 **Fig. 1: Body weight and serum cytokine levels during the course of IAV** 1108 **PR8/A/34(H1N1) infection.**

1109 (a) Shows the experimental model used in this study. Mice were infected i.n. with a sub-lethal  
1110 dose of influenza A/PR8/A/34(H1N1) and sampled between day 7 and 21 post-infection (dpi)  
1111 for PCR, flow cytometry (FACS), Western blot (WB) or synaptosome (SNS) analysis. (b) Rel-  
1112 ative body weight of naive (white boxes) vs. infected mice (black boxes) over the course of  
1113 IAV infection. Dashed vertical lines indicate the time points of experiments in line with the  
1114 experimental model depicted in (a). (c-j) Serum cytokine levels in infected mice from 0 to 11  
1115 dpi. Dashed vertical lines indicate the time points of experiments in line with the experimental  
1116 model and dashed horizontal lines indicate the detection limit of each cytokine, respectively.  
1117 Data are shown as mean  $\pm$  SEM and groups in (b) were compared by multiple Student's *t*-tests  
1118 with Holm-Sidak *post-hoc* correction. Significant differences are indicated by \* ( $p < .05$ , \*\*\*  $p$   
1119  $< .001$ ).

### 1120 **Fig. 2: Expression level of cytokines, chemokines, and interferon-stimulated** 1121 **genes in brains of naive and IAV-infected mice.**

1122 Brains of perfused animals were dissected into Cortex (CTX), Hippocampal formation (HPF),  
1123 and Olfactory bulb (OB) according to the Allen Mouse Brain Atlas [28] and used for RNA  
1124 isolation as described above. Gene expression in naive (white bars) and infected animals (black  
1125 bars) is shown for (a-d) cytokines and chemokines during the acute and late phase of IAV  
1126 infection (7-10 dpi); (e) IAV load in the brain during the acute and late phase of IAV infection  
1127 (7-10 dpi); (f, g) type I and II interferons during IAV infection (7-14 dpi); (h-k) induction of  
1128 interferon-stimulated genes during the late phase of IAV infection (10-14 dpi). Relative gene  
1129 expression was examined by RT-qPCR as described above and expression of target genes was

1130 normalized to the expression level of *Hprt*. Subsequently, relative expression was normalized  
1131 to the means of naive animals. Data are shown as mean  $\pm$  SEM and groups were compared via  
1132 Student's *t*-test with Welch's correction. Significant differences are indicated by \* ( $p < .05$ ).

1133 **Fig. 3: Gene expression level of blood-brain barrier-associated proteins upon**  
1134 **infection with IAV.**

1135 Brains were dissected into Cortex (CTX) and Hippocampal formation (HPF) as described  
1136 above. (a-c) The gene expression levels of the tight junction proteins Claudin-1 (*Cldn1*), Clau-  
1137 din-5 (*Cldn5*), and ZO-1 (*Tjp1*) were examined in naive (white bars) and infected animals  
1138 (black bars) during the acute and late phase of IAV infection (7-10 dpi). (d, e) Expression levels  
1139 of chemokines *Cxcl9* and *Cxcl10* during IAV infection (7-14 dpi). Relative gene expression  
1140 was determined by RT-qPCR as described above and expression of target genes was normalized  
1141 to the expression level of *Hprt*. Subsequently, relative expression was normalized to the means  
1142 of naive animals. Data are shown as mean  $\pm$  SEM and groups were compared via Student's *t*-  
1143 test with Welch's correction. Significant differences are indicated by \* ( $p < .05$ , \*\*  $p < .01$ , \*\*\*  
1144  $p < .001$ ).

1145 **Fig. 4: Histopathological and immunohistochemical examination of brain tissue**  
1146 **does not reveal alterations upon infection with IAV.**

1147 (a, b) Histopathological overview of representative sagittal paraffin sections from brains of  
1148 naive mice stained against IBA1 or CD11b. (c, d) Panels show the Cortex (CTX, left panels)  
1149 and Hippocampal formation region (HPF, right panels) from naive and infected mice (14 and  
1150 21 dpi) upon staining for IBA1 or CD11b. (e) Immunohistochemical preparation of cryosec-  
1151 tions shows representative images of microglia cells stained with antibodies for IBA1 and  
1152 TMEM119 and white arrows indicate strongly overlapping signals in both channels. (f) Com-  
1153 parison of microglia morphology in cryosections from naive (top panels) and IAV-infected

1154 mice (middle and bottom panels) during the late phase of IAV infection (10-14 dpi). Sections  
1155 were stained with antibodies against IBA1 and confocal microscopy images were generated for  
1156 Cortex (CTX, left panels) and Hippocampal formation (HPF, right panels). Inserts in bottom  
1157 right corners show selected microglia cells with higher detail. Scale bars = 50  $\mu\text{m}$ .

1158 **Fig. 5: Characterization of immune cell subsets and microglia activation in the**  
1159 **brains of IAV-infected animals.**

1160 Immune cells were isolated from perfused brains of naive and infected animals as described  
1161 above and subjected to flow cytometric analysis. **(a)** Unsupervised clustering of immune cell  
1162 subsets was performed by *t*-distributed stochastic neighbor embedding (*t*-SNE) and cells within  
1163 clusters were subsequently identified by manual gating. Further, differential expression of sur-  
1164 face markers CD45, CD11b, major histocompatibility (MHC) complex class I and II, CD80,  
1165 CD86, F4/80, and CX<sub>3</sub>CR1 is shown for the generated clusters. **(b, c)** Representative strategy  
1166 for manual gating. First, cells were selected based on the forward-scatter/side-scatter plot  
1167 (FSC/SSC) before exclusion of dead cells as well as doublets (not shown). Then, immune cell  
1168 populations were separated by their expression of the surface markers CD45 and CD11b into  
1169 brain resident CD45<sup>low</sup>CD11b<sup>+</sup> microglia cells and recruited CD45<sup>hi</sup>CD11b<sup>-</sup> or CD45<sup>hi</sup>CD11b<sup>+</sup>  
1170 cells. **(d-f)** Bar charts show the frequencies of identified immune cell populations in the brains  
1171 of naive (white bars) and IAV-infected animals (black bars) at 7 dpi. **(g-l)** Bar charts show the  
1172 frequencies of identified immune cell populations in specific brain regions (Cortex – CTX /  
1173 Hippocampal formation – HPF) of naive (white bars) and IAV-infected animals (black bars) at  
1174 10 and 14 dpi. **(m)** Heat map plot of relative microglia surface expression of MHC I, MHC II,  
1175 CD80, CD86, F4/80, and CX<sub>3</sub>CR1 in naive and infected mice at 10 and 14 dpi. Median fluo-  
1176 rescence intensities of expressed markers were normalized to their overall mean, respectively,  
1177 and data was plotted using R with “lattice” package. Data are shown as mean  $\pm$  SEM and groups

1178 were compared via Student's *t*-test with Welch's correction. Significant differences are indi-  
1179 cated by \* ( $p < .05$ , \*\*\*  $p < .001$ ).

1180 **Fig. 6: Gene expression levels of microglia activation-related genes and comple-**  
1181 **ment factors in brains of naive and IAV-infected mice.**

1182 Gene expression in naive (white bars) and infected animals (black bars) during the late phase  
1183 of IAV infection (10-14 dpi) is shown for (a-d) microglia activation-related genes and (e, f)  
1184 complement factors. Relative gene expression was examined by RT-qPCR as described above  
1185 and expression of target genes was normalized to the expression level of *Hprt*. Subsequently,  
1186 relative expression was normalized to the means of naive animals. Data are shown as  
1187 mean  $\pm$  SEM and groups were compared via Student's *t*-test with Welch's correction. Signifi-  
1188 cant differences are indicated by \* ( $p < .05$ , \*\*  $p < .01$ , \*\*\*\*  $p < .0001$ ).

1189 **Fig. 7: A new tool to analyze synaptic proteins via flow cytometry.**

1190 (a) Gene expression VGLUT1 (*Slc17a4*) was analyzed in whole brain homogenate of naive  
1191 (white bars) and IAV-infected mice at 10, 14, and 21 dpi (black bars). Relative gene expression  
1192 was examined by RT-qPCR as described above and expression of the target gene was normal-  
1193 ized to the expression level of *Hprt*. Subsequently, relative expression was normalized to the  
1194 mean of naive animals. Groups were compared via Student's *t*-test with Welch's correction. (b)  
1195 Synaptosomes were isolated from brain regions of perfused animals as described above and the  
1196 synaptosomal fraction [32] was subjected to electron microscopy. Red arrows indicate intact  
1197 synapses formed by a pre- and post-synaptic compartment. Scale bar in bottom left corner in-  
1198 dicates 500 nm (c) Graphical illustration of synaptosome selected in (b). Pre-synaptic nerve  
1199 endings still contain synaptic vesicles and mitochondria whereas post-synaptic domains are  
1200 characterized by their region of high post-synaptic density (PSD). (d, e) Protein content of  
1201 VGLUT1 from synaptosomes of whole brain homogenate was assessed via Western blot. Bar

1202 charts show the relative optical density of the proteins band from naive (white bars) and infected  
1203 animals (black bars) at 14 and 21 dpi upon normalization to  $\beta$ -Actin expression. Values were  
1204 further normalized to the mean of naive animals. Groups were compared via one-way ANOVA  
1205 with Holm-Sidak *post-hoc* correction. **(f-h)** Isolated synaptosomes were subjected to flow cy-  
1206 tometry and the used representative gating strategy is shown. **(f)** First, A gate with a size range  
1207 from 300-1000 nm was established in the FSC channel using silica beads. **(g)** Second, separa-  
1208 tion of biological particles from residues in the buffer was facilitated using the styryl dye FM4-  
1209 64 that integrates into the lipid membranes of biological organelles. Then, FSC-triggered de-  
1210 tection was replaced by fluorescence-triggered detection with FM4-64 in the BL3 channel with  
1211 a fluorescence threshold set above the noise at  $0.3 \times 10^3$  (not shown). **(h)** Lastly, events detected  
1212 in the size range of 300-1000 nm were further gated for their expression of VGLUT1. **(i)** Bar  
1213 chart shows the frequency of VGLUT1<sup>+</sup> events in the brains of naive (white bars) and IAV-  
1214 infected animals (black bars) at 14 and 21 dpi. In all cases, data are shown as mean  $\pm$  SEM and  
1215 significant differences are indicated by \* ( $p < .05$ , \*\*  $p < .01$ , \*\*\*  $p < .001$ , \*\*\*\*  $p < .0001$ ).

1216 **Fig. 8: Flow cytometric synaptosome analysis and gene expression of neurotro-**  
1217 **phins and neurotrophin receptors in naive and IAV-infected mice.**

1218 **(a-f)** Synaptosomes were isolated from Cortex (CTX) and Hippocampal formation (HPF) of  
1219 naive and IAV-infected mice and subjected to further flow cytometric analysis as shown in  
1220 figure 7 above. **(a, b)** After size gating and removal of unspecific events via fluorescence-trig-  
1221 gered detection (not shown), Synaptophysin<sup>+</sup> (Syp<sup>+</sup>) events were selected and subsequently  
1222 gated for Homer1<sup>+</sup> or Gephyrin<sup>+</sup>, respectively. **(c, d)** Bar charts show the frequencies of  
1223 Syp<sup>+</sup>Homer1<sup>+</sup> and Syp<sup>+</sup>Gephyrin<sup>+</sup> subpopulations from naive (white bars) and IAV-infected an-  
1224 imals (black bars) at 14 and 21 dpi. **(e, f)** Intact synaptosomes from excitatory synapses con-  
1225 sisting of a pre- and postsynaptic terminal (Syp<sup>+</sup>Homer1<sup>+</sup>) were further examined for their ex-  
1226 pression of VGLUT1 and GluR1. **(g-j)** RNA was isolated from brains of perfused animals as

1227 described above. Relative gene expression levels of BDNF (*Bdnf*), NGF (*Ngf*), TrkB (*Ntrk2*),  
1228 and p75<sup>NTR</sup> (*Ngfr*) were examined by RT-qPCR on different time points post IAV infection (10-  
1229 21 dpi). Expression of target genes was normalized to the expression level of *Hprt*. Subse-  
1230 quently, relative expression was normalized to the means of naive animals. For all graphs, data  
1231 are shown as mean  $\pm$  SEM and groups were compared via Student's *t*-test with Welch's correc-  
1232 tion. Significant differences are indicated by \* ( $p < .05$ ), \*\*  $p < .01$ , \*\*\*  $p < .001$ , \*\*\*\*  $p <$   
1233  $.0001$ ).

1234 **Suppl. Fig. 1: Lung cytokine levels during the course of IAV PR8/A/34(H1N1) in-**  
1235 **fection.**

1236 (a-i) Cytokine levels in the lung of infected mice from 0 to 11 dpi. Dashed vertical lines indicate  
1237 the time points of experiments in line with the experimental model and dashed horizontal lines  
1238 indicate the detection limit of each cytokine, respectively. Data are shown as mean  $\pm$  SEM.

1239 **Suppl. Fig. 2: Histopathological examination of neuronal markers in brain tissue**  
1240 **upon infection with IAV.**

1241 (a, b) Histopathological overview of representative sagittal paraffin sections from brains of  
1242 naive mice stained against MAP2 or NeuN. (c, d) Panels show the Cortex (CTX, left panels)  
1243 and Hippocampal formation region (HPF, right panels) from naive and infected mice (14 and  
1244 21 dpi) upon staining against MAP2 or NeuN. Scale bars = 50  $\mu$ m.

1245 **Suppl. Fig. 3: Phenotypical characterization of microglia cells in the late phase**  
1246 **of IAV infection.**

1247 Phenotype of microglia cells was analyzed by flow cytometry. (a-l) Histograms show the rep-  
1248 resentative expression level of the surface marker by cells (naive mice without tint, IAV-in-  
1249 fected mice tinted) in comparison to the corresponding FMO control (grey tint) at 10 dpi or 14

1250 dpi. Dashed vertical line and numbers mark cells positively expressing the surface marker  
1251 ( $\pm$  SEM). Groups were compared via Student's *t*-test with Welch's correction and significant  
1252 differences are indicated by \* ( $p < .05$ , \*\*  $p < .01$ , \*\*\*  $p < .001$ , \*\*\*\*  $p < .0001$ ).

1253

Figure 1

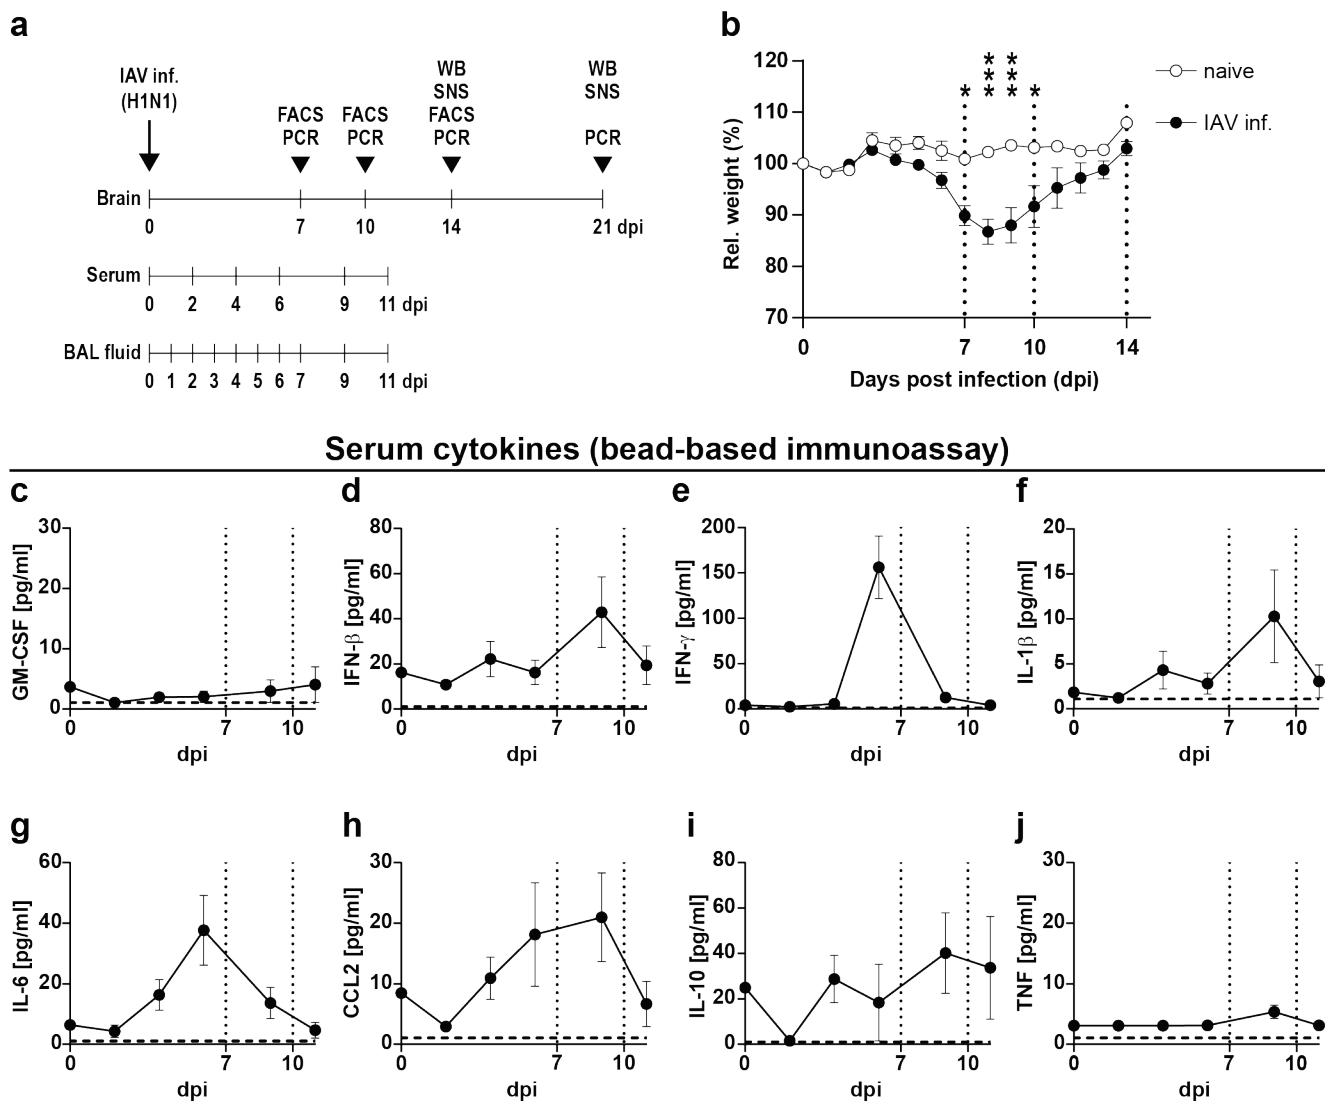

**Fig. 1** Body weight and serum cytokine levels during the course of IAV PR8/A/34(H1N1) infection.

(a) Shows the experimental model used in this study. Mice were infected i.n. with a sub-lethal dose of influenza A/PR8/A/34(H1N1) and sampled between day 7 and 21 post-infection (dpi) for PCR, flow cytometry (FACS), Western blot (WB) or synaptosome (SNS) analysis. (b) Relative body weight of naive (white boxes) vs. infected mice (black boxes) over the course of IAV infection. Dashed vertical lines indicate the time points of experiments in line with the experimental model depicted in (a). (c-j) Serum cytokine levels in infected mice from 0 to 11 dpi. Dashed vertical lines indicate the time points of experiments in line with the experimental model and dashed horizontal lines indicate the detection limit of each cytokine, respectively. Data are shown as mean  $\pm$  SEM and groups in (b) were compared by multiple Student's *t*-tests with Holm-Sidak *post-hoc* correction. Significant differences are indicated by \* ( $p < .05$ , \*\*\*  $p < .001$ ).



Figure 2

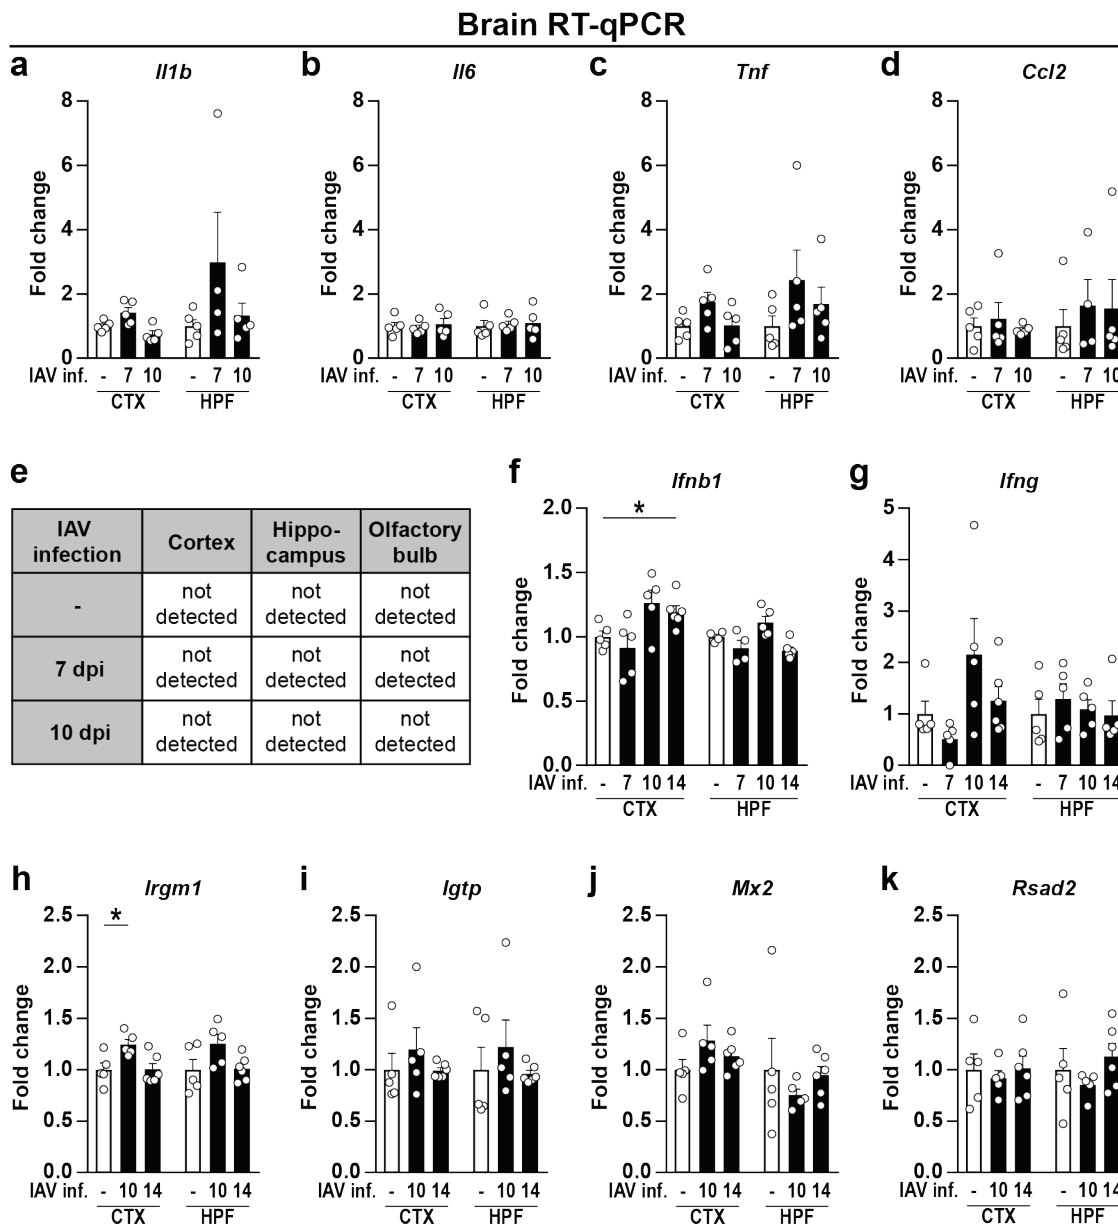

**Fig. 2** Expression level of cytokines, chemokines, and interferon-stimulated genes in brains of naive and IAV-infected mice.

Brains of perfused animals were dissected into Cortex (CTX), Hippocampal formation (HPF), and Olfactory bulb (OB) according to the Allen Mouse Brain Atlas (Lein et al., 2007) and used for RNA isolation as described above. Gene expression in naive (white bars) and infected animals (black bars) is shown for (a-d) cytokines and chemokines during the acute and late phase of IAV infection (7-10 dpi); (e) IAV load in the brain during the acute and late phase of IAV infection (7-10 dpi); (f, g) type I and II interferons during IAV infection (7-14 dpi); (h-k) induction of interferon-stimulated genes during the late phase of IAV infection (10-14 dpi). Relative gene expression was examined by RT-qPCR as described above and expression of target genes was normalized to the expression level of *Hprt*. Subsequently, relative expression was normalized to the means of naive animals. Data are shown as mean  $\pm$  SEM and groups were compared via Student's *t*-test with Welch's correction. Significant differences are indicated by \* ( $p < .05$ ).

Figure 3

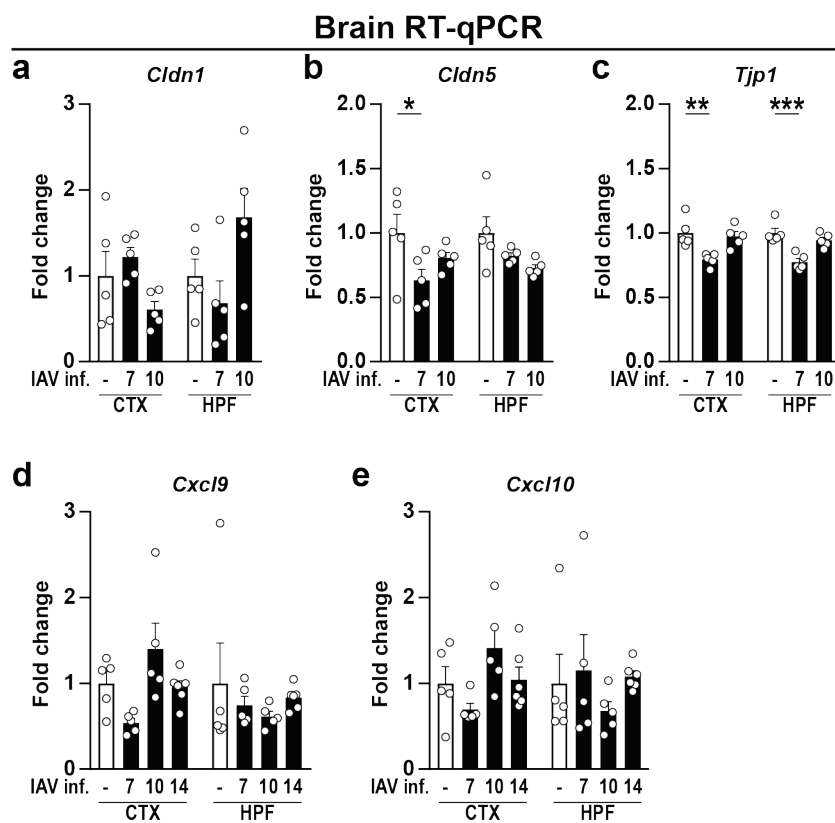

**Fig. 3 Gene expression level of blood-brain barrier-associated proteins upon infection with IAV.**

Brains were dissected into Cortex (CTX) and Hippocampal formation (HPF) as described above. (a-c) The gene expression levels of the tight junction proteins Claudin-1 (*Cldn1*), Claudin-5 (*Cldn5*), and ZO-1 (*Tjp1*) were examined in naive (white bars) and infected animals (black bars) during the acute and late phase of IAV infection (7-10 dpi). (d, e) Expression levels of chemokines *Cxcl9* and *Cxcl10* during IAV infection (7-14 dpi). Relative gene expression was determined by RT-qPCR as described above and expression of target genes was normalized to the expression level of *Hprt*. Subsequently, relative expression was normalized to the means of naive animals. Data are shown as mean  $\pm$  SEM and groups were compared via Student's *t*-test with Welch's correction. Significant differences are indicated by \* ( $p < .05$ ), \*\*  $p < .01$ , \*\*\*  $p < .001$ ).

Figure 4

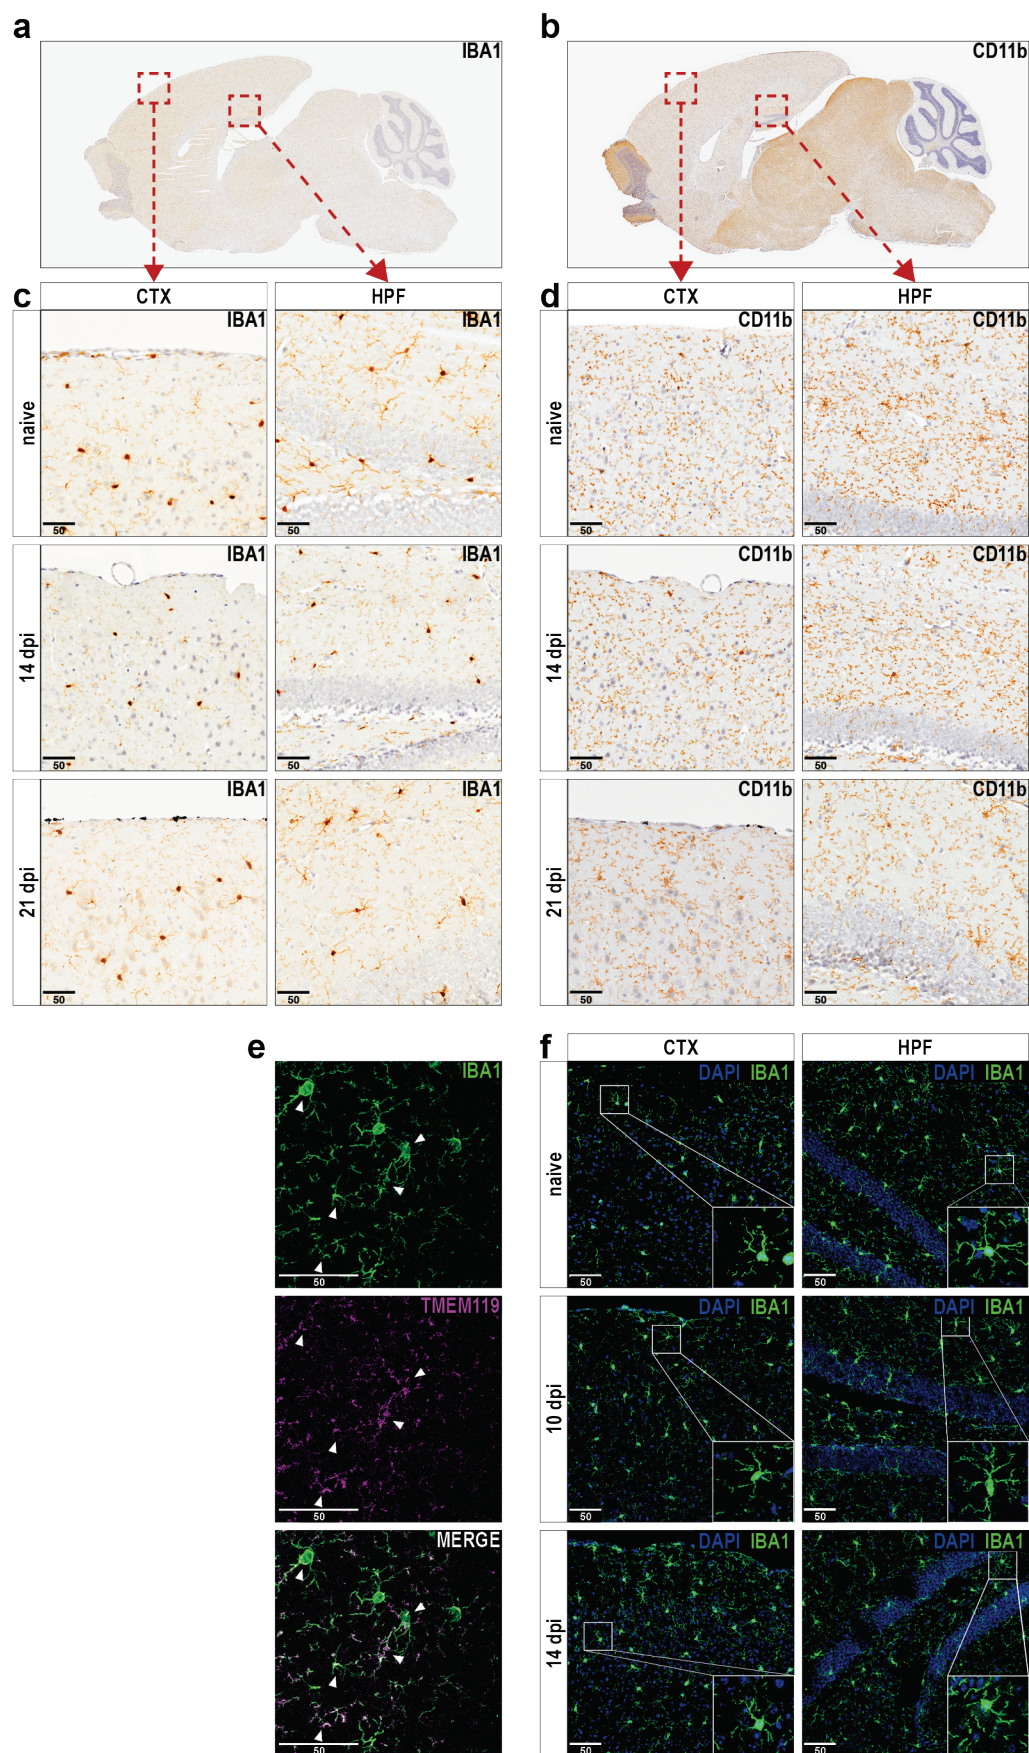

**Fig. 4** Histopathological and immunohistochemical examination of brain tissue does not reveal alterations upon infection with IAV.

## Figure 4

**(a, b)** Histopathological overview of representative sagittal paraffin sections from brains of naive mice stained against IBA1 or CD11b. **(c, d)** Panels show the Cortex (CTX, left panels) and Hippocampal formation region (HPF, right panels) from naive and infected mice (14 and 21 dpi) upon staining for IBA1 or CD11b. **(e)** Immunohistochemical preparation of cryosections shows representative images of microglia cells stained with antibodies for IBA1 and TMEM119 and white arrows indicate strongly overlapping signals in both channels. **(f)** Comparison of microglia morphology in cryosections from naive (top panels) and IAV-infected mice (middle and bottom panels) during the late phase of IAV infection (10-14 dpi). Sections were stained with antibodies against IBA1 and confocal microscopy images were generated for Cortex (CTX, left panels) and Hippocampal formation (HPF, right panels). Inserts in bottom right corners show selected microglia cells with higher detail. Scale bars = 50  $\mu\text{m}$ .



Figure 5

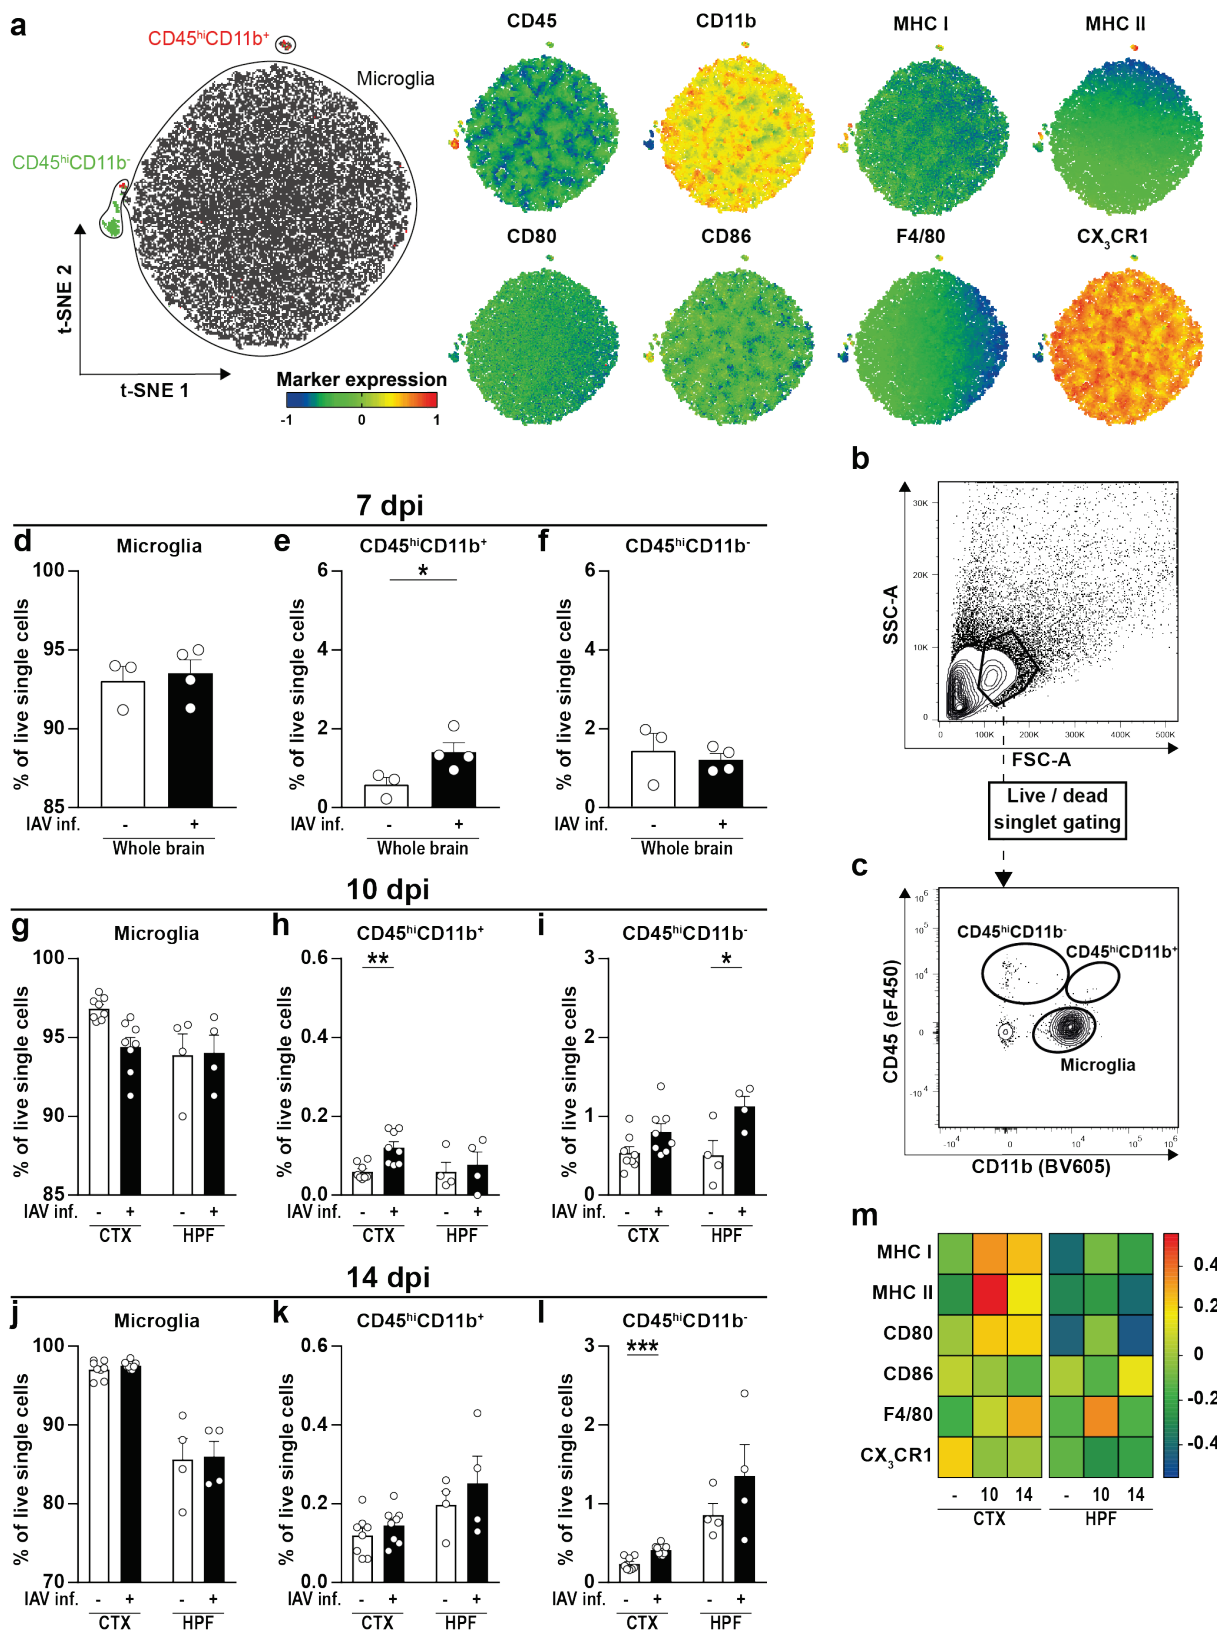

**Fig. 5 Characterization of immune cell subsets and microglia activation in the brains of IAV-infected animals.**

Immune cells were isolated from perfused brains of naive and infected animals as described above and subjected to flow cytometric analysis. (a) Unsupervised clustering of immune cell subsets was performed by *t*-distributed stochastic neighbor embedding (*t*-SNE) and cells within clusters were

## Figure 5

subsequently identified by manual gating. Further, differential expression of surface markers CD45, CD11b, major histocompatibility (MHC) complex class I and II, CD80, CD86, F4/80, and CX<sub>3</sub>CR1 is shown for the generated clusters. **(b, c)** Representative strategy for manual gating. First, cells were selected based on the forward-scatter/side-scatter plot (FSC/SSC) before exclusion of dead cells as well as doublets (not shown). Then, immune cell populations were separated by their expression of the surface markers CD45 and CD11b into brain resident CD45<sup>low</sup>CD11b<sup>+</sup> microglia cells and recruited CD45<sup>hi</sup>CD11b<sup>-</sup> or CD45<sup>hi</sup>CD11b<sup>+</sup> cells. **(d-f)** Bar charts show the frequencies of identified immune cell populations in the brains of naive (white bars) and IAV-infected animals (black bars) at 7 dpi. **(g-l)** Bar charts show the frequencies of identified immune cell populations in specific brain regions (Cortex – CTX / Hippocampal formation – HPF) of naive (white bars) and IAV-infected animals (black bars) at 10 and 14 dpi. **(m)** Heat map plot of relative microglia surface expression of MHC I, MHC II, CD80, CD86, F4/80, and CX<sub>3</sub>CR1 in naive and infected mice at 10 and 14 dpi. Median fluorescence intensities of expressed markers were normalized to their overall mean, respectively, and data was plotted using R with “lattice” package. Data are shown as mean ± SEM and groups were compared via Student’s *t*-test with Welch’s correction. Significant differences are indicated by \* ( $p < .05$ , \*\*\*  $p < .001$ ).

Figure 6

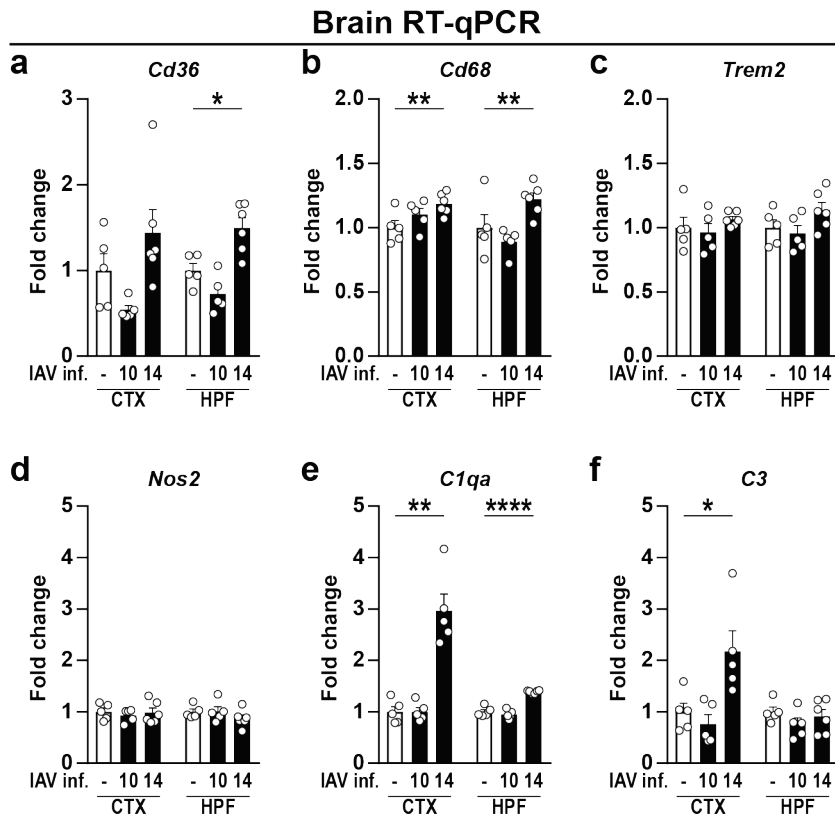

**Fig. 6 Gene expression levels of microglia activation-related genes and complement factors in brains of naive and IAV-infected mice.**

Gene expression in naive (white bars) and infected animals (black bars) during the late phase of IAV infection (10-14 dpi) is shown for (a-d) microglia activation-related genes and (e, f) complement factors. Relative gene expression was examined by RT-qPCR as described above and expression of target genes was normalized to the expression level of *Hprt*. Subsequently, relative expression was normalized to the means of naive animals. Data are shown as mean  $\pm$  SEM and groups were compared via Student's *t*-test with Welch's correction. Significant differences are indicated by \* ( $p < .05$ , \*\*  $p < .01$ , \*\*\*\*  $p < .0001$ ).

Figure 7

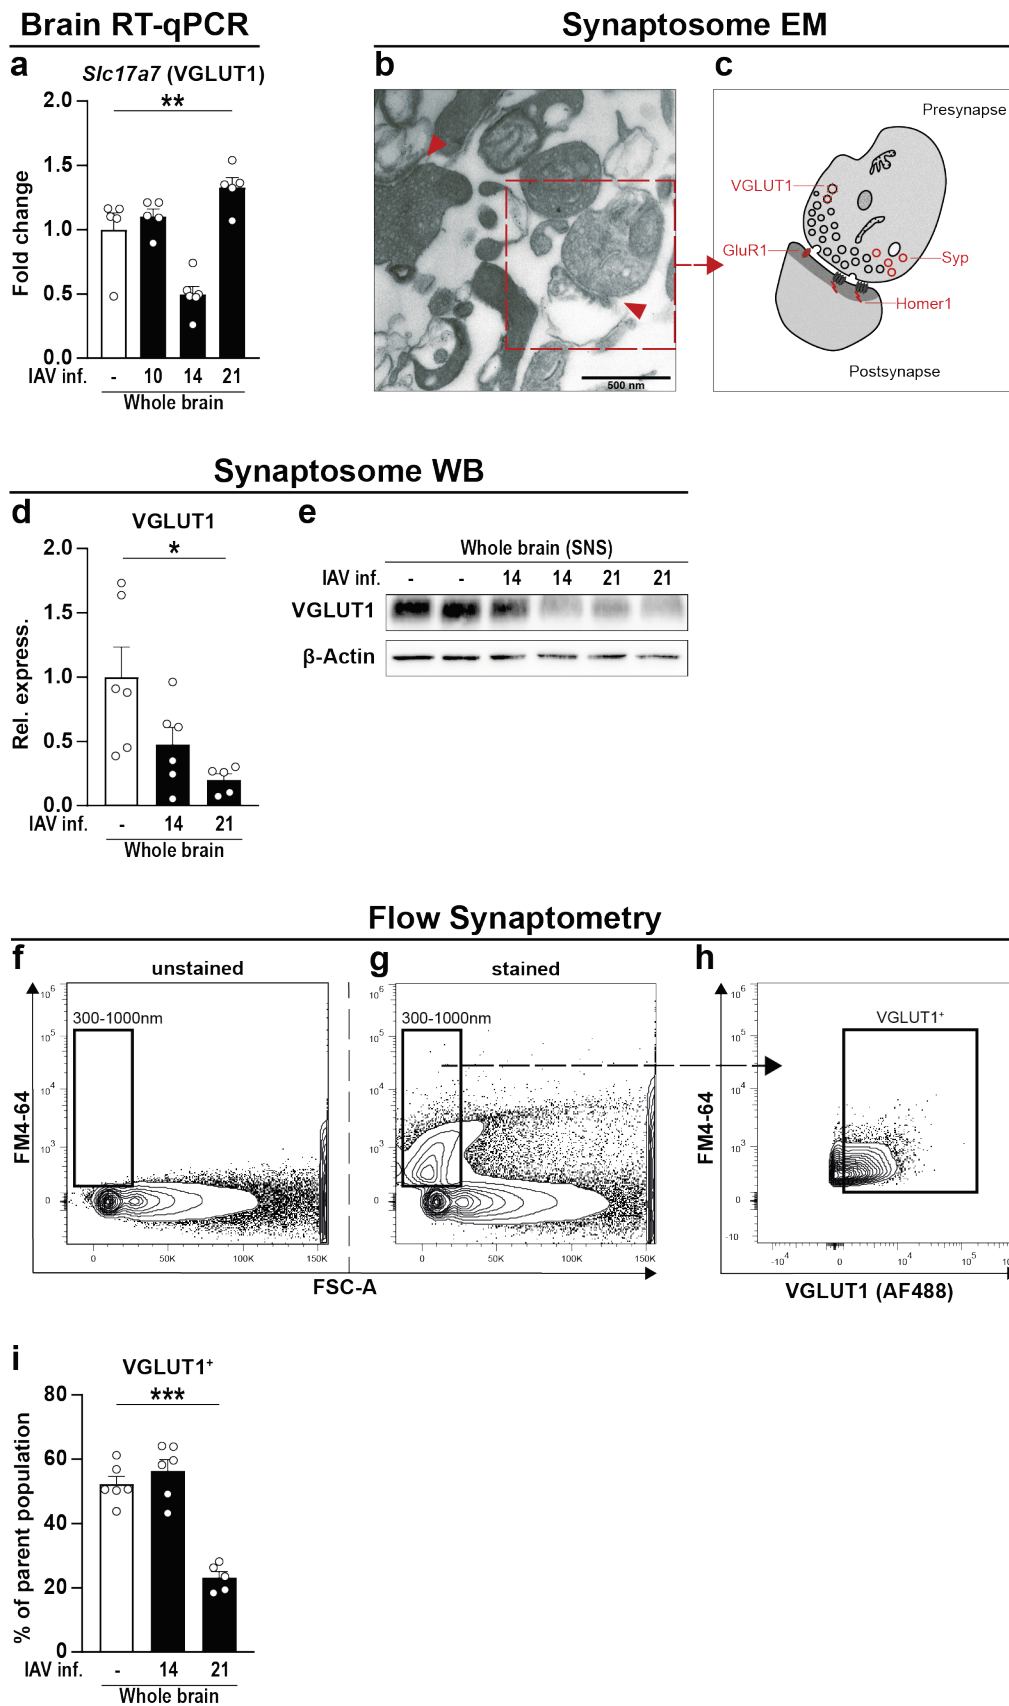

**Fig. 7 A new tool to analyze synaptic proteins via flow cytometry.**

(a) Gene expression VGLUT1 (*Slc17a4*) was analyzed in whole brain homogenate of naive (white bars) and IAV-infected mice at 10, 14, and 21 dpi (black bars). Relative gene expression was



## Figure 7

examined by RT-qPCR as described above and expression of the target gene was normalized to the expression level of *Hprt*. Subsequently, relative expression was normalized to the mean of naive animals. Groups were compared via Student's *t*-test with Welch's correction. **(b)** Synaptosomes were isolated from brain regions of perfused animals as described above and the synaptosomal fraction (Smalla et al., 2013) was subjected to electron microscopy. Red arrows indicate intact synapses formed by a pre- and post-synaptic compartment. Scale bar in bottom left corner indicates 500 nm **(c)** Graphical illustration of synaptosome selected in **(b)**. Pre-synaptic nerve endings still contain synaptic vesicles and mitochondria whereas post-synaptic domains are characterized by their region of high post-synaptic density (PSD). **(d, e)** Protein content of VGLUT1 from synaptosomes of whole brain homogenate was assessed via Western blot. Bar charts show the relative optical density of the proteins band from naive (white bars) and infected animals (black bars) at 14 and 21 dpi upon normalization to  $\beta$ -Actin expression. Values were further normalized to the mean of naive animals. Groups were compared via one-way ANOVA with Holm-Sidak *post-hoc* correction. **(f-h)** Isolated synaptosomes were subjected to flow cytometry and the used representative gating strategy is shown. **(f)** First, A gate with a size range from 300-1000 nm was established in the FSC channel using silica beads. **(g)** Second, separation of biological particles from residues in the buffer was facilitated using the styryl dye FM4-64 that integrates into the lipid membranes of biological organelles. Then, FSC-triggered detection was replaced by fluorescence-triggered detection with FM4-64 in the BL3 channel with a fluorescence threshold set above the noise at  $0.3 \times 10^3$  (not shown). **(h)** Lastly, events detected in the size range of 300-1000 nm were further gated for their expression of VGLUT1. **(i)** Bar chart shows the frequency of VGLUT1<sup>+</sup> events in the brains of naive (white bars) and IAV-infected animals (black bars) at 14 and 21 dpi. In all cases, data are shown as mean  $\pm$  SEM and significant differences are indicated by \* ( $p < .05$ , \*\*  $p < .01$ , \*\*\*  $p < .001$ , \*\*\*\*  $p < .0001$ ).

Figure 8

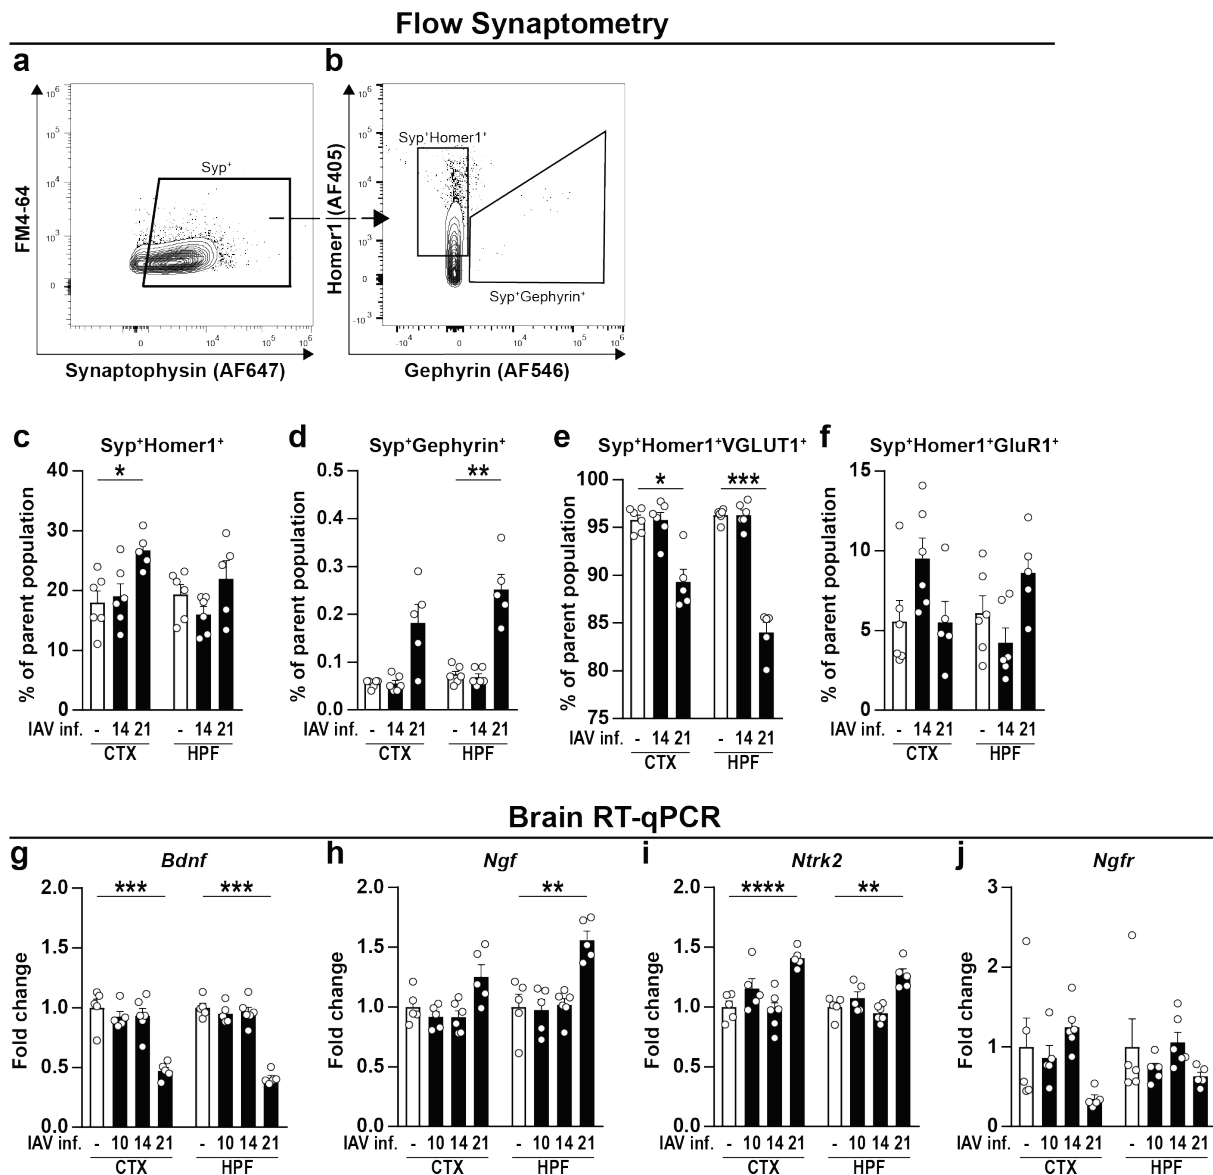

**Fig. 8 Flow cytometric synaptosome analysis and gene expression of neurotrophins and neurotrophin receptors in naive and IAV-infected mice.**

(a-f) Synaptosomes were isolated from Cortex (CTX) and Hippocampal formation (HPF) of naive and IAV-infected mice and subjected to further flow cytometric analysis as shown in figure 7 above. (a, b) After size gating and removal of unspecific events via fluorescence-triggered detection (not shown), Synaptophysin<sup>+</sup> ( $Syp^+$ ) events were selected and subsequently gated for Homer1<sup>+</sup> or Gephyrin<sup>+</sup>, respectively. (c, d) Bar charts show the frequencies of  $Syp^+Homer1^+$  and  $Syp^+Gephyrin^+$  subpopulations from naive (white bars) and IAV-infected animals (black bars) at 14 and 21 dpi. (e, f) Intact synaptosomes from excitatory synapses consisting of a pre- and postsynaptic terminal ( $Syp^+Homer1^+$ ) were further examined for their expression of VGLUT1 and GluR1. (g-j) RNA was isolated from brains of perfused animals as described above. Relative gene expression levels of BDNF (*Bdnf*), NGF (*Ngf*), TrkB (*Ntrk2*), and p75<sup>NTR</sup> (*Ngfr*) were examined by RT-qPCR on different time points post IAV infection (10-21 dpi). Expression of target genes was normalized to the expression level of *Hprt*. Subsequently, relative expression was normalized to the means of naive animals. For all graphs, data are shown as mean  $\pm$  SEM and groups were compared via

## Figure 8

Student's *t*-test with Welch's correction. Significant differences are indicated by \* ( $p < .05$ , \*\*  $p < .01$ , \*\*\*  $p < .001$ , \*\*\*\*  $p < .0001$ ).

Suppl Fig. 1

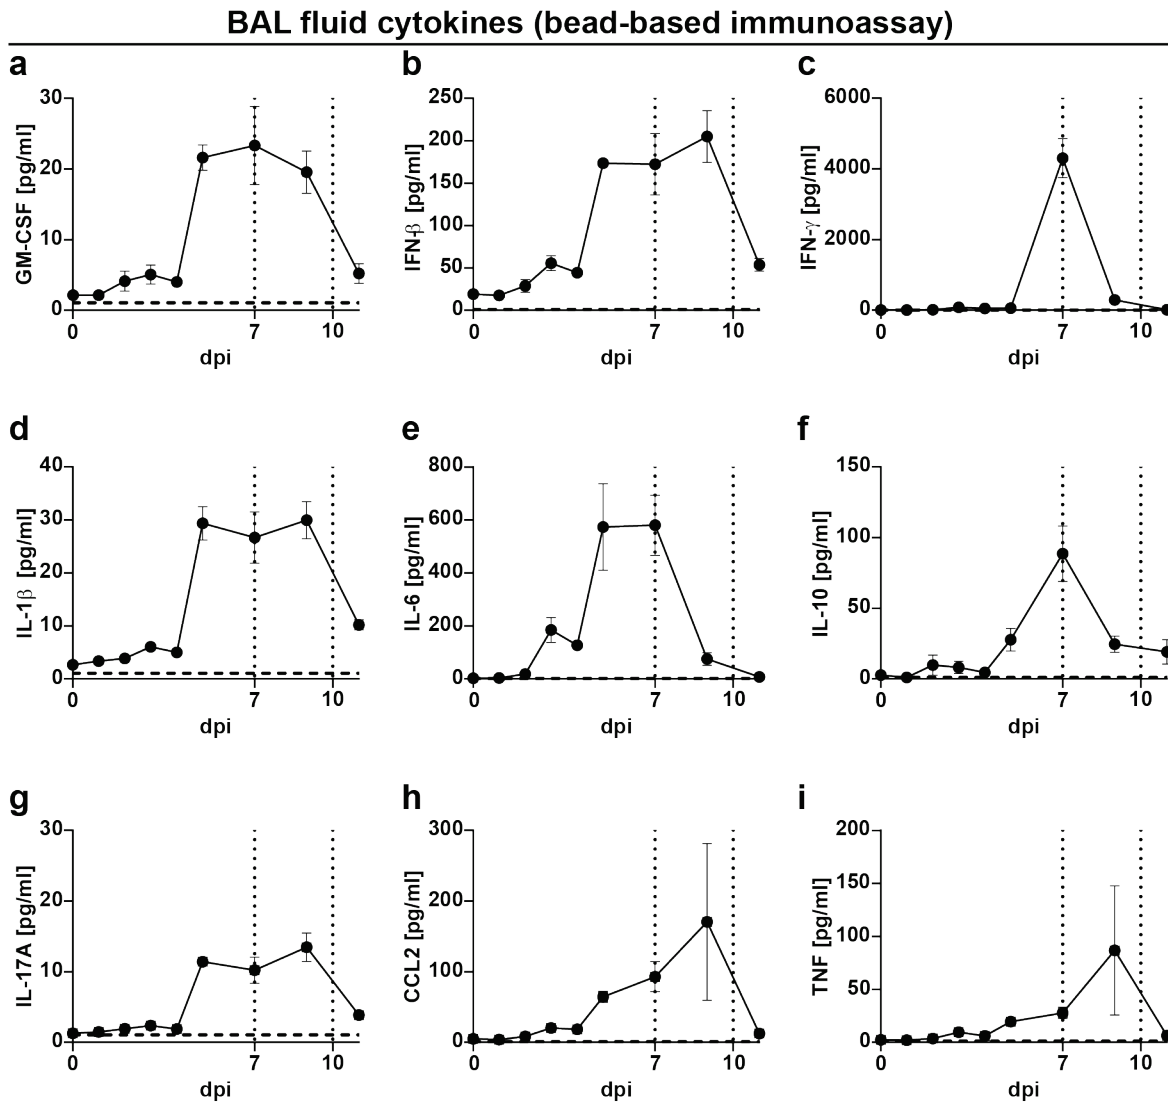

**Suppl. Fig. 1 Lung cytokine levels during the course of IAV PR8/A/34(H1N1) infection.**

(a-i) Cytokine levels in the lung of infected mice from 0 to 11 dpi. Dashed vertical lines indicate the time points of experiments in line with the experimental model and dashed horizontal lines indicate the detection limit of each cytokine, respectively. Data are shown as mean  $\pm$  SEM.

Suppl Fig. 2

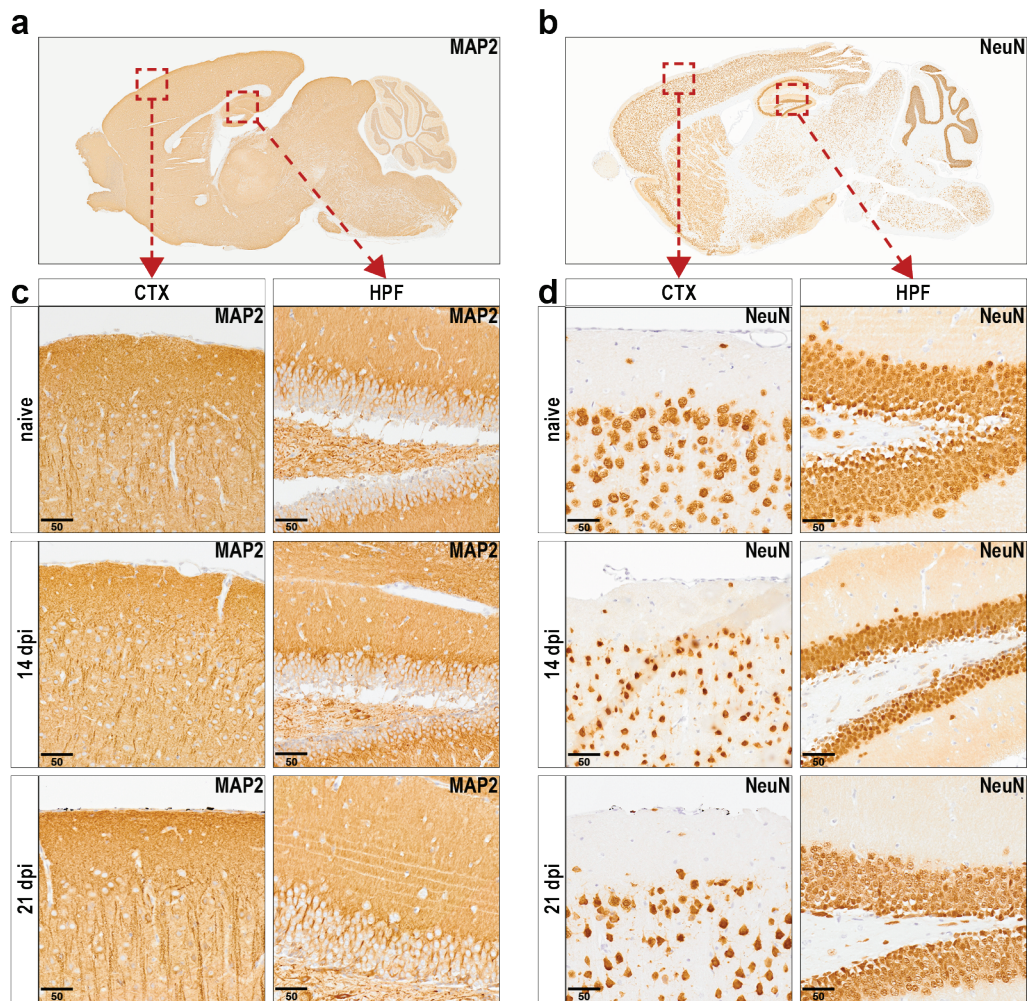

**Suppl. Fig. 2** *Histopathological examination of neuronal markers in brain tissue upon infection with IAV.*

(a, b) Histopathological overview of representative sagittal paraffin sections from brains of naive mice stained against MAP2 or NeuN. (c, d) Panels show the Cortex (CTX, left panels) and Hippocampal formation region (HPF, right panels) from naive and infected mice (14 and 21 dpi) upon staining against MAP2 or NeuN. Scale bars = 50 μm.

Suppl Fig. 3

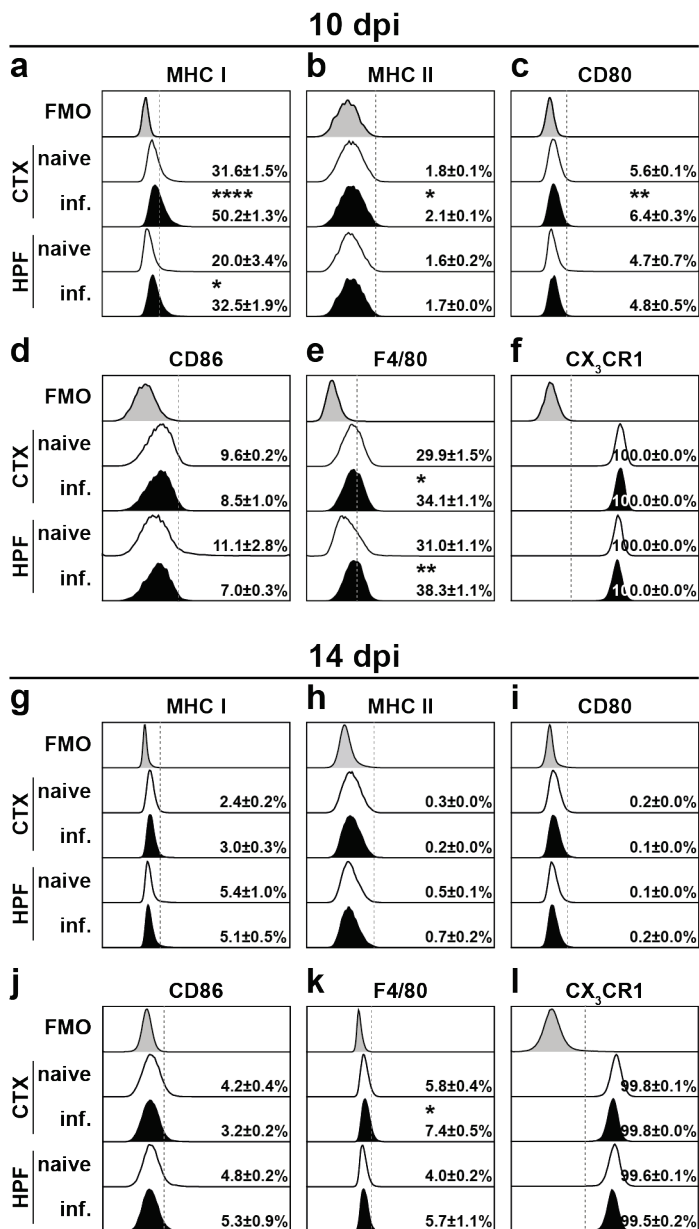

**Suppl. Fig. 3 Phenotypical characterization of microglia cells in the late phase of IAV infection.**

Phenotype of microglia cells was analyzed by flow cytometry. (a-l) Histograms show the representative expression level of the surface marker by cells (naive mice without tint, IAV-infected mice tinted) in comparison to the corresponding FMO control (grey tint) at 10 dpi or 14 dpi. Dashed vertical line and numbers mark cells positively expressing the surface marker ( $\pm$  SEM). Groups were compared via Student's *t*-test with Welch's correction and significant differences are indicated by \* ( $p < .05$ ), \*\* ( $p < .01$ ), \*\*\* ( $p < .001$ ), \*\*\*\* ( $p < .0001$ ).
